1 **Recent invasion of P transposable element into *Drosophila yakuba***

2

3 Antonio Serrato-Capuchina, Stephania Zhang, Wendy Martin, David Peede, Eric Earley, and  
4 Daniel R. Matute

5

6 <sup>1</sup>Biology Department, University of North Carolina, Chapel Hill, N.C. USA

7

8

9

10

11 ¶ Correspondence:

12 Biology Department, University of North Carolina, Chapel Hill, North Carolina

13 250 Bell Tower Drive, Genome Sciences Building

14 Chapel Hill, NC

15 27510, USA

16

17 **RUNNING TITLE: P elements into *Drosophila yakuba***

18

19 **KEY WORDS**

20 P-element, hybrid dysgenesis, *Drosophila yakuba*, transposable elements

21

## 22 **ABSTRACT**

23 Transposable elements (TEs) are self-replicating genetic units that are common across  
24 prokaryotes and eukaryotes. They have been implicated in the origin of new molecular functions  
25 and in some cases, new phenotypes. Yet, the processes that lead to their evolution and how they  
26 enter the genome of their hosts remain largely underexplored. The P-element is one of the most  
27 well-known TEs in Eukaryotes, due to its rapid expansion in *Drosophila melanogaster* in the  
28 1960s and its faster invasion of *D. simulans*, despite its fitness consequences in both species.  
29 Here, we describe a recent invasion of P-elements into *Drosophila yakuba*. Overall, PEs were  
30 found in *D. yakuba* with no PEs detected across its sister species, *D. teissieri* and *D. santomea*.  
31 These findings are surprising due the lack of a genetic bridge between *D. yakuba* and other  
32 *Drosophila* that harbor PEs, implicating a horizontal gene transfer mechanism similar to the one  
33 that gave rise to the invasion of PEs in *D. melanogaster* and *D. simulans*. We also report that the  
34 presence of these PEs causes a mild hybrid dysgenesis phenomenon; namely they cause a  
35 reduction in female reproductive potential (lower number of ovaries and ovarioles), but only at  
36 29°C and not at 23°C. Given the ability of PEs to cross species boundaries and the fact that both  
37 *D. santomea* and *D. teissieri* have the ability to produce fertile progeny with *D. yakuba*, the  
38 *yakuba* species complex provides an opportunity to study PE spread through vertical  
39 transmission.

40

## 41 **ARTICLE SUMMARY**

42 P-elements (PEs) are transposons found in Neotropical *Drosophila* species. PEs have previously  
43 invaded two African *Drosophila* species where they rapidly increased in population frequency  
44 and fixed. We found that PEs invaded the genome of *D. yakuba*, an African species. In just 8  
45 years, the frequency of the PEs increased from 0% to 18% but then decreased to 2%. This  
46 turnover shows that PE invasions can be transient. We found no evidence of full PEs in *D.*  
47 *yakuba*' sister species, *D. santomea* and *D. teissieri*. PEs in this species complex can reveal the  
48 interplay between transposable elements and hybridization in nature.

49

## 50 INTRODUCTION

51

52 Transposable elements (TEs) are autonomous genetic units that are able to propagate  
53 throughout the genome of a host (McClintock 1950, 1953). TEs are widespread across a vast  
54 range of organisms (reviewed in (Chuong *et al.* 2016)). In some cases, TE also prove to be a  
55 rapid method of genetic innovation (Werren 2011; Warren *et al.* 2015). TEs are often associated  
56 with the origin of new genetic and phenotypic diversity. In vertebrates, TEs have been shown to  
57 contribute to the evolution of gene circuits, leading to new lineage-specific gene regulation and  
58 functions. In the case of primates, for example, TEs can serve as a source of new variants in  
59 regulatory sequences (Trizzino *et al.* 2017). In angiosperms a significant portion of adaptive  
60 novelty is thought to be due to the activity of TEs (active TE-Thrust), resulting in gene  
61 duplications, novel expression patterns, and in some cases, gene disruptions (Debolt 2010; Ågren  
62 and Wright 2015). Other cases have shown the role of TEs in the origin of new phenotypes (Ding  
63 *et al.* 2016) and they have been commonly associated in the genetic basis of interspecific  
64 differences (Warren *et al.* 2015). TEs have often been associated with genome expansions across  
65 multiple taxa, potentially playing a role in the evolution of genome size (Vicent and Casacuberta  
66 2017). In some of the most spectacular cases of genome expansions, fungal genomes are  
67 composed of up to 20% TEs, fish genomes are 55% TE, and in maize' genome is up to 62% TEs  
68 (Sanmiguel and Bennetzen 1998; Daboussi and Capy 2003; Chalopin *et al.* 2015; Bilinski *et al.*  
69 2018).

70 In the case of the *Drosophila*, TEs make up 20% of the genome (Eggleston *et al.* 1988)  
71 but this percentage varies depending on the population and species (Vieira *et al.* 1999). One of  
72 the best studied cases of the phenotypic effects of TEs in animals—and across Eukaryotic  
73 systems—is P-elements (PEs) in *Drosophila*. PEs have rapidly spread worldwide throughout  
74 populations of the genetic model system, *D. melanogaster* (Engels and Preston 1980). Despite  
75 the self-replicating nature of TEs, this spread is puzzling, due to the negative phenotypic effects  
76 they cause. PEs in *D. melanogaster* lead to F1 sterility when the germ line of the female does not  
77 carry the molecular machinery regulating the expansion of PEs (Michalak 2009; Tasnim and  
78 Kelleher 2017). When a female who lacks PEs mates with a PE male carrier, the resulting  
79 F1s—both females and males—are sterile and show elevated rates of chromosomal breakage  
80 and increased mutation rates, a suite of traits referred to collectively as hybrid dysgenesis (HD)

81 (Kidwell *et al.* 1977). Conversely, if a female with PEs mates with a PE male carrier, the F1s are  
82 fertile. In this case, the effects of PEs are silenced through a maternally inherited and germline-  
83 specific subclass of small non-coding RNAs, piRNAs (PIWI-interacting RNAs). This RNA  
84 facilitated silencing mechanism is not specific to PEs and has been shown to underlie repression  
85 throughout multiple classes of TEs and seems to play a role in repression across a variety of  
86 plant and mammalian hybrids (Michalak 2009). In *Drosophila*, F1 sterility due to the action of  
87 PEs is a simple and elegant model of how relatively simple genomic changes (i.e., the invasion  
88 of a TE) can induce reproductive isolation between genotypes rapidly and potentially lead to  
89 speciation (Serrato-Capuchina and Matute 2018).

90 PEs are thought to have originated in the *Drosophila willistoni* species group and,  
91 through a horizontal transfer event mediated by an unknown vector, invaded *D. melanogaster*  
92 (Kidwell 1992). In the case of *D. melanogaster*, despite the negative consequences associated  
93 with them, PEs managed to spread through vertical transmission throughout populations on  
94 every continent within 34 years (Kidwell 1983). PEs are also present in *D. simulans* but not in *D.*  
95 *sechellia*, two of the species that form the *simulans* clade, a sister group to *D. melanogaster*. PEs  
96 spread into *D. simulans*' entire range within 15 years (Kofler *et al.* 2015). Since the hybrid  
97 progeny between *D. melanogaster* and *D. simulans* are sterile (Sturtevant 1920; Ranz *et al.*  
98 2004), the invasion of PEs into *D. simulans* must have different origins outside of vertical  
99 transmission. As a result, a natural question is whether the genomes of related species have also  
100 been invaded by PEs and whether there are any conserved patterns in their transmission and  
101 phenotypic effects (Watson and Demuth 2013; Marco *et al.* 2018; Serrato-Capuchina and Matute  
102 2018).

103 In order to understand how TEs regularly increase in frequency across a vast array of  
104 genomes it is crucial to study their spread, and potential reproductive tradeoffs, early in genomic  
105 invasions. For example, understanding the rate at which PEs increase in frequency through  
106 *Drosophila* species could inform how the HD phenomena arises and how PEs came to be so  
107 prevalent *D. melanogaster* and *D. simulans* populations. An ideal scenario to understand how PE  
108 increase in frequency is to obtain longitudinal samples and uncover an invasion in its early  
109 stages.

110 The *yakuba* species complex is an ideal model to study early TE expansion in natural  
111 populations. The complex consists of three species –*D. yakuba*, *D. santomea*, and *D. teissieri*–

112 which exhibit diverse life history traits and wide geographic range. *Drosophila yakuba* is a  
113 widespread commensal species with similar life history traits to *D. melanogaster* and *D.*  
114 *simulans*. *Drosophila teissieri* is also widespread (although in fragmented populations, (Cobb *et*  
115 *al.* 2000) but is thought to be specialized to *Parinari* fruits (Lachaise *et al.* 1988; Comeault *et al.*  
116 2017). The third species, *Drosophila santomea*, is endemic to the island of São Tomé where it is  
117 mainly found in undisturbed high montane forest (Lachaise *et al.* 2000; Matute 2010). Notably,  
118 the *yakuba* species complex has the only two known stable hybrid zones in the *melanogaster*  
119 species group. These zones exist between *D. yakuba* and *D. santomea* (Llopart *et al.* 2009;  
120 Turissini and Matute 2017), and between *D. yakuba* and *D. teissieri* (Cooper *et al.* 2017b).

121 We studied whether any of the species from the *yakuba* species complex harbored PEs  
122 and explored the phenotypic effects of recent PE invasions into an unexposed species. We  
123 performed a longitudinal study across 5 locations and 5 different time points in an attempt to  
124 pinpoint the early phenotypic effects of a PE invasion into novel species. We surveyed the *D.*  
125 *yakuba* clade across five collection years (ranging from 2003 to 2018) to explore whether the PE  
126 has spread into any of the three species. We found that *D. yakuba* harbors PEs, and that their  
127 frequency increased from 0% to 18% but then decreased to 2%. We did not find evidence of  
128 complete PEs in *D. yakuba*' sister species, *D. santomea* and *D. teissieri*, despite ecological  
129 overlap in geographic range. Additionally, we explored whether the hybrid dysgenic phenotype  
130 is expressed within *D. yakuba*, the species that recently acquired the PE. We tested for hybrid  
131 dysgenesis at two temperatures, 23° and 29°C, previously shown to be associated with HD in  
132 both *D. melanogaster* and *D. simulans* (Schaefer *et al.* 1979; Hill *et al.* 2016a). Our results show  
133 that PEs in *D. yakuba* can indeed cause HD but only at higher temperatures, which is consistent  
134 with the most deleterious effects of PEs in other *Drosophila* species. Notably, and unlike *D.*  
135 *melanogaster* and *D. simulans*, we found no HD at 23°C. Since no species that hybridizes with  
136 *D. yakuba* (and produce fertile progeny) carries functional PEs, the introduction of PEs is  
137 puzzling and suggestive of a horizontal gene transfer, mirroring invasions in other species of the  
138 *melanogaster* species subgroup. Our *D. yakuba* longitudinal sampling also revealed a sudden  
139 increase followed by a drastic drop in frequency of PEs which might shed light on the precise  
140 selective pressures that lead to rapid increases of this autonomous elements. Finally, our study  
141 presents the opportunity to study the dynamics of PE transmission across a hybridizing species

142 complex, despite recently collected populations of *D. teissieri* and *D. santomea* not appearing to

143 contain PEs.

144

## 145 METHODS

146

### 147 P-element detection from genome sequences

148

149 We used previously published genomes (Turissini and Matute 2017; Turissini *et al.* 2018) to  
150 assess whether there were PEs in the genomes of eight species of the *melanogaster* species  
151 group. Multiple methods have been proposed to quantify the allele frequency of known TE  
152 insertions in particular locations of the genome (reviewed in Serrato-Capuchina & Matute,  
153 2018). However, our goal was to determine whether species from the *yakuba* clade harbor PEs  
154 anywhere in the genome. Therefore, we mapped raw reads from five *Drosophila* species to the  
155 *D. melanogaster* PE sequence (<http://flybase.org/reports/FBte0000037.html>) using bwa  
156 (Supplementary information) and calculated the number of mapped reads per million (rpm)  
157 (Kofler *et al.* 2018). We followed this procedure for the three species in the *yakuba* species  
158 group (*D. santomea*:  $N=17$ ; *D. teissieri*:  $N=13$ ; *D. yakuba*:  $N=109$ ), as well as *D. simulans*  
159 ( $N=72$ ), *D. sechellia* ( $N=XX$ ), *D. mauritiana* ( $N=XX$ ) and *D. melanogaster* ( $N=104$ ). We also  
160 include reads from seven individuals of *D. orena* originated from the same isofemale line. The  
161 FASTQ file accession numbers of the sequences are listed in Table S1. Lines were considered to  
162 be candidates in harboring PEs if any read mapped to the PE sequence. For each species, we also  
163 calculated their mean  $\log(\text{rpm}+1)$  and assessed whether that mean differed from zero (One  
164 Sample t-test, library stats, function '*t.test*'). We adjusted the critical P-values for significance to  
165 0.01 to account for multiple comparisons (5 comparisons). To ensure comparable mapping  
166 results, we used Single End sequences only. For those lines that have been sequenced with  
167 Paired End reads, we used only one of the ends, chosen randomly.

168

### 169 P-element detection at the population level

170

171 Fly lines: Our genomic survey revealed that species from the *D. yakuba* are likely to harbor PEs  
172 (See Results). Thus, we explored which individuals from a large collection of natural isolates  
173 from the three species in the group that harbored PEs. We collected females and males in the  
174 field from the three species across their geographical range (Table S2). We surveyed a total of  
175 531 *D. yakuba*, 27 *D. teissieri*, and 336 *D. santomea* individuals. Populations were collected

176 across 5 locations (Bioko, São Tomé, Príncipe, Cameroon, and Kenya; Figure S1) throughout  
177 their African range in 2003, 2009, 2013, 2015 and 2018. Collection details for each individual  
178 are listed in Table S2. 95% confidence intervals for point estimates of the proportion of  
179 individuals with PEs were calculated using the conjugate beta prior on the distribution of  
180 successes (library binom, function ‘*binom.cloglog*’ (Sundar Dorai-Raj and Sundar Dorai-Raj  
181 2006)).

182  
183 PCR: Using independent *yakuba* clade isofemale lines, we measured the frequency of PEs at  
184 different years in the three species of the *yakuba* species complex. To this end, we assessed  
185 whether individuals from these lines had any of the four exons that constitute a full PE. Since  
186 PEs require all four exons to be functional, our goal was to type all the individuals for each exon  
187 individually using PCR. We extracted genomic DNA from one female of each isoline (or an  
188 individual in ethanol) following the 96-well Puregene extraction kit protocol. To individually  
189 amplify each of the 4 exons that make up the full PE, we used primers described in (Hill,  
190 Schlötterer, & Betancourt, 2016). We did all PCRs using NEB reagents in a 10ul reaction (1ul  
191 10x buffer, 1ul 10mM MgCl<sup>2</sup>, 0.5 ul 10mM dNTPs, 0.3 ul 10mM F+R primers, 1ul DNA, 0.05  
192 Taq Polymerase, 5.85 ul H<sub>2</sub>O) with a thermocycling cycle of 92° denaturing, 59° annealing, 72°  
193 extension for 35 cycles in an Applied Biosystems 2720 Thermal Cycler. To score  
194 presence/absence of each exon, we ran 5ul of the PCR product in a 2% (APEX-BIO) agarose gel  
195 for 60 minutes at 120 volts and visualized the results using ethidium bromide staining. Sanger  
196 sequencing (Eurofins) was used to verify for PE presence in isolines that amplified for each  
197 primer to ensure the presence of the full continuous element.

198  
199 Phylogenetic analysis: We aligned the sequence of each of the four exons of the PE found in *D.*  
200 *yakuba* with the sequence of their counterparts in *D. melanogaster*, *D. simulans*, *D. willistoni*,  
201 and *D. prosaltans* (accession numbers in Table S3) using MUSCLE (Edgar 2004). Exon  
202 sequences were limited to 500bp length primer amplifications (Kofler *et al.* 2015). Unrooted  
203 maximum likelihood trees were generated using RAxML with the transition/transversion ratio,  
204 proportion of invariant sites, and tree topology set to estimates. We calculated support for each  
205 branch by bootstrapping the tree 1,000 times. Trees were visualized with FigTree (Chevenet *et*  
206 *al.* 2006).



207

208 Hybrid dysgenesis: In crosses where PEs cause HD, F1 females and males from crosses between  
209 a PE<sup>-</sup> females and a PE<sup>+</sup> male (PE<sup>-</sup>/PE<sup>+</sup>) show stark gonadal defects. Females show atrophied  
210 ovaries and males show small testis (Raff *et al.* 1990). We explored whether *D. yakuba* F1s  
211 showed gonadal defects associated with HD. We scored four possible phenotypes *i*) presence of  
212 atrophied/rudimentary ovaries, *ii*) reduced number of ovarioles per ovary, *iii*) early onset of  
213 female reproductive senescence, and *iv*) reduced male fertility. We scored the four possible F1  
214 genotypes following the steps as described below.

215

216 Crosses: We collected *D. yakuba* virgin flies from PE<sup>+</sup> and PE<sup>-</sup> isolines within 8 hours of  
217 eclosion and housed them in sex-specific vials. All flies were aged 4 to 9 days to minimize age  
218 effects. Crosses were performed by housing 5 individuals of each sex in a single vial. We made  
219 reciprocal F1s by crossing PE lines to non-PE carrying lines and produced the 4 types of possible  
220 progeny: PE<sup>-</sup>/PE<sup>+</sup>, PE<sup>-</sup>/PE<sup>-</sup>, PE<sup>+</sup>/PE<sup>-</sup>, PE<sup>-</sup>/PE<sup>-</sup>. To minimize the effect of different isofemale  
221 lines, we used a random number generator to determine the isolines that were mated. In total, we  
222 used 5 isolines of PE containing São Tomé *D. yakuba* and 5 isolines of non-PE containing *D.*  
223 *yakuba*. We left the vials undisturbed at their test temperatures until removing the adults after 5  
224 days, adding a 0.05% propionic acid solution and a pupation substrate to the food (Kimwipe,  
225 Kimberly Clark). F1s were collected as virgins daily and separated by sex. All crosses were  
226 performed both at 23°C and at 29°C, to measure the effect of temperature in the magnitude of  
227 HD.

228

229 Gonad number—Counts: First, we scored whether F1 had 0,1 or 2 developed gonads, with  
230 healthy females and males having 2 ovaries and 2 testes respectively, at both 23° and 29°C. After  
231 4 to 9 days, flies were anesthetized with CO<sub>2</sub> and their gonads removed with metallic forceps  
232 (Wong and Schedl 2006). Gonads from each individual were subsequently fixed on a precleaned  
233 glass slide with chilled *Drosophila* Ringer's solution (Cold Spring Harbor Protocols). We  
234 counted the number of non-atrophied gonads for each individual. Ovaries were considered  
235 atrophied if they had no ovarioles. Testes were considered atrophied if they had less than half the  
236 length of wild-type testes, however, all males contained wild-type testes. In the case of females,  
237 we also counted the number of ovarioles (see below) in each mature ovary using a Leica, S6E

238 stereoscopic microscope. We scored 273 females at 23°C and 186 females at 29°C. Table 1  
239 shows the number of females dissected for each genotype. For ovariole counts, we only scored  
240 flies for which the dissection contained both left and right gonads.

241  
242 Ovary number—Statistical analyses: We scored whether each F1 female had 0, 1, or 2 ovaries as  
243 described above. To quantify the magnitude of heterogeneity among F1 genotypes, we fitted a  
244 multinomial regression using the function *multinom* in the library *nnet* (Venables *et al.* 2003)  
245 where the number of ovaries was the response of the multinomial assay and the mother and  
246 father genotypes were the fixed effects. We also included the interaction between these two  
247 effects to account for the interplay between the genome of the two parents. The significance of  
248 the effects was inferred using the function *set\_sum\_contrasts* (library *car* (Fox and Sanford  
249 2011)), and a type III ANOVA (library *stats* (R-Core-Team 2013)) in R. Since we did  
250 experiments at two different temperatures (23°C and 29°C), we fitted two multinomial  
251 regressions. To do post-hoc comparisons between crosses, we used a Two-Sample Fisher-Pitman  
252 Permutation Test (library *coin*, function ‘*oneway\_test*’; (Hothorn *et al.* 2006)) and adjusted the  
253 critical P-values for significance to 0.008 to account for multiple comparisons (6 comparisons).

254  
255 Ovariole number—statistical analyses: A second potential phenotype of HD is the reduction in  
256 the number of ovarioles per ovary in female F1s, in females that did not show atrophied ovaries  
257 (Khurana *et al.* 2011). In these females, even with 2 ovaries, their reproductive potential can be  
258 limited through a lack of ovarioles (Lobell *et al.* 2017). We quantified whether the genotype of  
259 the mother, of the father, or the interaction between these two terms affected the number of  
260 ovarioles. We analyzed the mean number of ovarioles per ovary (i.e., females with two ovaries  
261 will have more total ovarioles than females with one ovary) to account for difference in the  
262 number of ovaries. We excluded those females that showed completely atrophied ovarioles from  
263 this analysis. We used a Poisson-distributed linear model (library *stats*, function ‘*glm*’ (R-Core-  
264 Team 2013)). To assess the significance of interactions, we followed a maximum-likelihood  
265 model simplification approach (Crawley 1993); we first fitted a fully factorial model containing  
266 all factors and interactions and then simplified it by a series of stepwise comparisons, starting  
267 with the highest-order interaction and progressing to lower-order interaction terms and then to  
268 main effects.

269

270 Female reproductive senescence—counts. We explored whether the age of the female had an  
271 effect on the number of ovarioles in PE<sup>+</sup> and PE<sup>-</sup> females. Specifically, we explored whether HD  
272 manifested itself as a shorter reproductive period in females that carried PEs (Lobell *et al.* 2017).  
273 In this scenario PE<sup>+</sup> will show a sharper decline in their ovariole number compared to their PE<sup>-</sup>  
274 females. To score females of different age, we cleared bottles and collected newly eclosed  
275 virgins within 8 hours of clearing as described above (Section ‘Crosses’). To account for  
276 heterogeneity across lines, we studied 5 different isolines per population type: 5 PE<sup>+</sup> isofemale  
277 lines from São Tomé, 5 PE<sup>-</sup> isofemale lines from São Tomé, and 5 PE<sup>-</sup> isofemale lines from the  
278 African continent, for a total of 15 isofemale lines per time point. Female virgins were then  
279 dissected every 5 days for 25 days to count the ovariole count as they aged. In total there were  
280 1,125 observations: 5 time points × 5 isolines × 15 individuals per line × 3 distinct population  
281 types.

282

283 Female reproductive senescence—Statistical analyses: We used an Analysis of covariance  
284 (ANCOVA) to assess whether the presence of PEs affected the reproductive capacity of a female  
285 at different ages. We used the function *lm* in the R library *stats* (R-Core-Team 2013). First, we  
286 used the regression coefficients from the ANCOVA to compare the intercept of the linear  
287 regressions of females with and without PEs. This test assessed whether genotypes had inherent  
288 differences in the number of ovarioles (i.e., whether the effect of genotype—if a female is PE<sup>+</sup> or  
289 PE<sup>-</sup>—was significant). Second, we compared the rate of decline of fertility among genotypes. To  
290 this end, we quantified differences in the slope of the regressions of number of ovarioles as age  
291 progressed (i.e., the interaction between female age and her genotype). To evaluate the  
292 significance of the interaction, we used information obtained with the function *lm* as described  
293 immediately above and also performed a likelihood ratio test (LRT; function *lrtest*, R library  
294 *lmtest* (Kuznetsova *et al.* 2015)).

295

296 Male fertility—sperm motility. We scored whether F1 male progeny produced motile sperm. We  
297 dissected the testes of each individual with metallic forceps (Miltex Catalogue number: 17-301,  
298 McKesson, Richmond, VA) and mounted them on chilled Ringer’s solution. We mounted up to  
299 five males per slide and scored whether they had motile sperm within 5 minutes of starting the

300 first dissection. We scored 843 F1 males at 23°C and 542 F1 males at 29°C. To quantify the  
301 effect of the genotype on sperm motility among F1 genotypes, we fitted a binomial regression  
302 (library stats, function ‘*glm*’). Whether a male had fertile sperm or not was the response of the  
303 binomial model, while the mother and father genotypes were the fixed effects. We also included  
304 the interaction between these two effects to account for the interplay between the genome of the  
305 two parents. We used LRTs (described above) to test whether to retain the interaction and the  
306 fixed effects. We found no sterile males at 23°C, so we only fitted a single linear model at 29°C.  
307 To do posthoc tests, we used a Tukey Honest significance difference test (library multcomp,  
308 function ‘*glht*’).

309  
310 Male fertility—progeny count. Finally, we scored whether F1 male progeny showed reduced  
311 fertility despite showing normal size testes (see above). We collected F1 males from the four F1  
312 genotypes raised at the two studied temperatures (23°C and 29°C) and mated them to virgin PE-  
313 females. We watched the matings to ensure they were not abnormally short (less than 10 minutes  
314 (Matute and Coyne 2010)); as soon as the mating was over, we removed the male from the vial.  
315 We let the female lay eggs for 10 days. After this period, we removed the females and let the  
316 progeny develop at 23°C. Every two days, we counted the progeny produced by each female  
317 until no more flies emerged. We quantified the heterogeneity of the amount of progeny using a  
318 generalized linear model similar to the one described above (section ‘Ovariole  
319 number—statistical analyses’) where the number of progeny produced by each individual female  
320 was the response, the genotype of the cross and temperature at which the cross was performed  
321 were the fixed effects.

## 322 323 Data availability

324 Supplemental Material, File S1 contains supplementary figures, supplementary tables and  
325 supplementary legends. Figures S1 and S2 are supplementary figures. Table S1 lists all the short  
326 read accessions used in this manuscript. Table S2 lists the flies screened with PCR. Isofemale  
327 lines are available upon request. Table S3 lists this PE sequence accession numbers. Tables S4-  
328 S6 report supplementary results.

329 The code used for all analyses reported here is available on Dryad (Accession number:  
330 TBD). All counts, raw pictures, and datasets are also deposited in Dryad.

## 331 **RESULTS**

332

### 333 **Genome wide detection of P-elements in *D. yakuba*, *D. santomea* and *D. teissieri***

334

335 We used previously published genome sequences for isofemale lines in the *D.*  
336 *melanogaster* species group to test for the presence of the PE sequence. The provenance of these  
337 genomes is geographically heterogeneous and includes lines from multiple locations (Table S1).  
338 Our analyses included eight of the nine species of the *melanogaster* species subgroup (*D.*  
339 *yakuba*, *D. teissieri*, *D. santomea*, *D. mauritiana*, *D. sechellia*, *D. orena*, *D. simulans* and *D.*  
340 *melanogaster*). The last two have previously been reported to harbor PEs. All tested species  
341 showed at least one read mapping to a portion of the PE sequence, of which the *D. melanogaster*  
342 and *D. simulans* genomes showed the highest signal for presence of PEs, followed by *D. yakuba*  
343 (Figure 1). (*D. melanogaster* is not shown as all 104 lines had reads mapping to the PE  
344 sequence).

345 Figure S2 show the log(rpm+1) for the *yakuba* species clade. There is extensive variation  
346 in the number of reads that map to the PE sequence across species (One-way ANOVA,  $F_{4,310} =$   
347  $872.32$ ,  $P < 1 \times 10^{-10}$ ). This heterogeneity persists even after only the lines from the *yakuba* clade  
348 are included ( $F_{2,136} = 7.454$ ,  $P = 8.474 \times 10^{-4}$ ), mainly driven by the fact that all *D. santomea* lines  
349 showed low coverage for the PEs. These mapping results are consistent with previous reports of  
350 *D. melanogaster* and *D. simulans* lines that contain PEs (Kofler *et al.* 2015) and gave rise to the  
351 hypothesis that other species in the *melanogaster* species subgroup might harbor PEs. We tested  
352 this hypothesis for each of the species in the *yakuba* clade using PCR by amplifying each PE  
353 exon individually.

354

### 355 **P-elements have changed in frequency in *D. yakuba* from São Tomé**

356

357 Next, we focused on species from the *D. yakuba* species group and scored the proportion  
358 of individuals that harbor a PE, across multiple years, throughout continental and island  
359 populations. This approach allowed us a temporal and longitudinal snapshot of PE spread within  
360 each species of the *yakuba* clade; *D. yakuba*, *D. teissieri*, and *D. santomea*. The results from the  
361 each of three species within the *D. yakuba* species complex are described as follows.

362

363 *Drosophila yakuba*: PCR amplification showed no evidence for PEs across continental lines  
364 (lines scored in Table S2). Similarly, before 2013, *D. yakuba* collections from São Tomé,  
365 showed no evidence of PEs. Additionally, we found no PEs in individuals collected in the island  
366 of Bioko, 460kms to the north of São Tomé. As of 2015, 18% of the *D. yakuba* individuals  
367 collected in São Tomé harbored PEs (19 out of 106 individuals, 95% confidence interval:  
368 [11.32%-25.76%]), with the frequency decreasing to 2% in 2018 (4 out of 200, 95% confidence  
369 interval: [0.08%- 4.65%]; Figure 2). It is worth noting that 61 out of 66 lines whose genome was  
370 sequenced (all collected before 2010) showed at least one read that mapped to the PE sequence,  
371 albeit at low levels. Notably, all reads map to a single terminal region in Exon 3 (Figure 1)  
372 suggesting that none of these lines had a full PE.

373 We assessed whether individuals from these populations had the full PE. In 2015, of the  
374 19 individuals that were PE positive, only 6 of them contained the entire PE, with the remaining  
375 13 lacking at least 1 of the 4 exons. In 2018, of the four individuals that were PE positive, two  
376 contained the full element and the other two contained partial elements. The detailed results of  
377 this screening are shown in Table S4. In the span of 2 years (2013 to 2015) the proportion of  
378 individual *D. yakuba* in São Tomé with PEs increased from 0% to 18% but by 2018 PEs were  
379 found in only 2% of lines (N=200) sampled on the same island.

380

381 *Drosophila teissieri*: *D. teissieri* is present across continental Africa and its neighboring island of  
382 Bioko. We examined 27 lines collected between 1970 and 2015. The majority of the lines were  
383 collected in the island of Bioko between 2009 and 2013. We found only one individual that  
384 contained any portion of the PE, a typed female from the isofemale TBRAZ28 (collected in  
385 Brazzaville, Republic of Congo), which contained exons 0 and 3 of the P-element. Since a  
386 functional PE requires all the four exons, we conclude that either no functional P-element is  
387 present in any *D. teissieri* line or that PEs are segregating at a population frequency lower than  
388 1/27. This result differs from our genome detection approach but are not inconsistent. The lines  
389 Cascade 4.3, Cascade 4.1, and Cascade 2.4, all from the island of Bioko show no PCR amplicons  
390 for any of the PE exons but show reads that map to the PE sequence. The short read coverage  
391 does not suggest the presence of a continuous (and active) PE. Some of the missing sequence is  
392 precisely where the PCR primers anneal, thus explaining why the PCR scans did not detect them.

393

394 *D. santomea*: Lastly, we scored *D. santomea*, the sister species of *D. yakuba*. Since this species  
395 is endemic to the island of São Tomé, all the lines we studied were collected in this island  
396 (N=236 lines). We found no evidence for any of the four exons of the PE, strongly suggesting  
397 that either the PE is not present in this species or that it segregates at a population frequency  
398 lower than (1/336).

399

#### 400 **P-element genealogy**

401

402 We built a phylogeny using the sequence of the PEs found in the *melanogaster* species  
403 subgroup (*D. melanogaster*, *D. simulans* and *D. yakuba*). We found that the PE sequences are  
404 not partitioned by species (Figure 3). This result is consistent with the longitudinal sampling in  
405 these three species which suggests recent invasions of the PEs. The invasion seems to be recent  
406 enough that none of the PEs have accumulated any distinct differences.

407

#### 408 **P-elements cause mild hybrid dysgenesis in *D. yakuba***

409

410 Since the presence of PEs is polymorphic across *D. yakuba*, a natural hypothesis is that  
411 their presence might cause hybrid dysgenesis in PE<sup>-</sup>/PE<sup>+</sup> individuals, mirroring effects described  
412 in both *D. melanogaster* and *D. simulans*. We assessed four possible outcomes of PEs in isolines  
413 and their resulting F1s consistent with the described effects of hybrid dysgenesis in other species:  
414 reduced number of ovaries, reduced number of ovarioles per ovary in females, early onset of  
415 reproductive senescence, and lack of sperm/reduced fertility in males. We describe each of these  
416 phenotypes as follows.

417

418 **Ovary number**. First, we scored whether females from the four possible genotypes (♀PE<sup>+</sup>/♂PE<sup>+</sup>,  
419 ♀PE<sup>+</sup>/♂PE<sup>-</sup>, ♀PE<sup>-</sup>/♂PE<sup>+</sup>, and ♀PE<sup>-</sup>/♂PE<sup>-</sup>) had 0, 1, or 2 ovaries. Wild type females usually have  
420 2, while dysgenic flies show either 0 or 1 ovary (Engels and Preston 1980). We dissected females  
421 produced at two different temperatures, 23°C and 29°C. At 23°C, we found no heterogeneity in  
422 the number of ovaries among parental or F1 female genotypes as every single female (N > 21 per  
423 genotype) had 2 ovaries (as observed in Figure 4A).

424           However, the number of ovaries between genotypes differs at 29°C. Among F1 females,  
425 we found multiple individuals with no ovaries (Figure 4B) and significant heterogeneity in the  
426 number of ovaries by type of cross when reared at 29°C (Figure 4B). The mean, standard  
427 deviations, and post-hoc pairwise comparisons (permutation based) are shown in Table 1. ♀PE<sup>-</sup>  
428 /♂PE<sup>-</sup> F1 females always have two ovaries (N=21). All the other three F1 genotypes showed  
429 fewer ovaries than the ♀PE<sup>-</sup>/♂PE<sup>-</sup> cross (Table 1, Figure 4). F1s resulting from crosses in which  
430 only the male contained the full PE (♀PE<sup>-</sup>/♂PE<sup>+</sup>) resulted in the most severe fitness costs with  
431 50% of F1s containing no ovaries (Table 1, Figure 4). In F1s resulting from crosses in which  
432 only the female contained the full PE (♀PE<sup>+</sup>/♂PE<sup>-</sup>), the number of F1s without ovaries was close  
433 to 15% (Figures 2 and 3A, Table 1). Finally, in cases where both parentals contained full PEs, no  
434 F1s had a complete loss of ovaries, with 15% of F1s containing 1 ovary and the remainder  
435 containing both ovaries (Figures 3 and 4A, Table 1). The heterogeneity in ovary number was due  
436 the interaction of the mother and the father genotype (LR=29.7097, df=6, P=4.463 × 10<sup>-5</sup>). These  
437 results are consistent with the hypothesis that PEs cause a HD syndrome where ♀PE<sup>-</sup>/♂PE<sup>+</sup> F1s  
438 are the most affected, a phenomenon similar to the one observed in *D. simulans* and *D.*  
439 *melanogaster*.

440  
441 Ovariole number. Hybrid dysgenesis can manifest itself not only as the absence of ovaries but  
442 also through the development of “rudimentary” ovaries, i.e. ovaries with fewer ovarioles. We  
443 counted the mean number of ovarioles in F1 females in the four types of F1 progeny. For these  
444 analyses, we excluded all individuals that had completely atrophied ovaries and consequently no  
445 ovarioles. At 23°C we found heterogeneity across genotypes and the source of that variation was  
446 the interaction between the female and the male genotype (Figure 5A, Table S5). Surprisingly,  
447 ♀PE<sup>+</sup>/♂PE<sup>-</sup> F1 female progeny had more ovarioles than the mean from any other cross  
448 direction (an average of a 48% increase, Figure 5B). All other crosses produced an average of 25  
449 total ovarioles and were no different from each other (Table 2). This result suggests, that at least  
450 in *D. yakuba*, females with PEs might show the conditional fitness advantage of increased  
451 fertility when mated to males that do not have PEs.

452           Generally, at 29°C, independent of the male used in cross, F1s produced from PE<sup>-</sup>  
453 females have more ovarioles than PE<sup>+</sup> females. ♀PE<sup>-</sup>/♂PE<sup>+</sup> females have fewer ovarioles than  
454 ♀PE<sup>-</sup>/♂PE<sup>-</sup> females (Z-test on regression coefficients = 4.477, P= 7.58 × 10<sup>-6</sup>; Table S5).



455 However, we found no difference in the number of ovarioles between ♀PE<sup>-</sup>/♂PE<sup>+</sup> and ♀PE<sup>+</sup>/♂  
456 PE<sup>+</sup> females (Table 2). The pairwise comparisons (shown in Table 2) indicate that the only clear  
457 pattern is that ♀PE<sup>-</sup>/♂PE<sup>-</sup> F1s have more ovarioles than females from any of the other three  
458 genotypes. It is worth noting that our power to detect differences at 29°C is lower as all the  
459 genotypes show lower fertility than at 23°C. Just as it occurs with ovary number, the PE-induced  
460 reduction in ovariole number is temperature dependent and only occurs at high temperature.

461  
462 Reproductive senescence. A third potential phenotype in hybrid dysgenesis is that PE-carrying  
463 females show a rapid decrease in fertility as they age (Schnebel and Grossfield 1988).  
464 Specifically, we tested whether the presence of PEs was predictive of reproductive output  
465 throughout the lifespan of females. We tested this possibility by counting the number of  
466 ovarioles of females with and without PEs at five different ages for 25 days (Figure 6). As  
467 expected (Wayne *et al.* 2006), the number of ovarioles decreases as females age (Table 3). The  
468 intercept was similar for both types of females which indicates the initial reproductive potential  
469 is similar in females carrying and not carrying PEs (genotype effect: Table 3). Additionally, the  
470 rate of decrease (i.e., the slope of the linear regression) was not different for the two regressions  
471 either (genotype by age interaction: Table 3). These results indicate that, at least at 23°C, PEs in  
472 *D. yakuba* do not induce early reproductive senescence.

473  
474 Male sterility. We studied male sterility in two ways. First, we dissected the testes of F1 males  
475 from crosses between PE<sup>-</sup> and PE<sup>+</sup> individuals. At 23°C, no F1 male, regardless of their  
476 genotype, showed atrophied testes. All males had motile sperm at this temperature. At 29°C,  
477 male sterility was most often observed in individuals produced from the crosses that involved a  
478 PE<sup>+</sup> parent (PE<sup>-</sup>/PE<sup>+</sup>, PE<sup>+</sup>/PE<sup>-</sup>, and PE<sup>+</sup>/PE<sup>+</sup>) than in males with no PEs (PE<sup>-</sup>/PE<sup>-</sup>; Table 4). The  
479 likelihood of obtaining F1 sterile males was slightly higher if the mother carried PEs ( $\chi^2_1 = 4.01$ ,  
480  $P = 0.045$ ) but not if the father did ( $\chi^2_1 = 2.457$ ,  $P = 0.117$ ). All LRT tests shown in Table S6.

481 Second, we scored the fertility of the four different genotypes of males when they mated  
482 to PE<sup>-</sup> females. When males were raised either at 23°C or 29°C, we found no differences in the  
483 number of progeny produced between genotypes (cross effect:  $F_{3,72} = 0.639$ ,  $P = 0.593$ ).  
484 Consistent with previous studies (Stanley *et al.* 1980; Matute *et al.* 2009), we found that higher  
485 temperatures (i.e., 29°C) reduce male fertility in *D. yakuba* (temperature effect:  $F_{1,72} = 4.370$ ,  $P$

486 = 0.040) but no differential effect of temperature on different PE carriers and non-carriers (cross  
487  $\times$  temperature effect:  $F_{3,32} = 0.341$ ,  $P=0.796$ ). Unlike the strong effect of PEs in female fertility  
488 (at least at 29°C), the effect of PEs in male fertility is little to non-existent.

489

## 490 **DISCUSSION**

491

492 P transposable elements (PEs) have rapidly spread across various *Drosophila* species and have  
493 invaded their genomes at different rates and geographic locations. In at least two different  
494 *Drosophila* species, PEs have reached populations in every continent (Kidwell *et al.* 1977;  
495 Kofler *et al.* 2015; Hill *et al.* 2016b). This increase in frequency is surprising because PEs have  
496 drastic fitness costs associated with heterotypic matings: F1 progeny from crosses between non-  
497 PE containing females and PE containing males are regularly sterile (Kidwell *et al.* 1977; Hill *et*  
498 *al.* 2016b). Here, we show that the genome of some *D. yakuba* individuals now harbor PEs,  
499 while its two sister-species (*D. santomea* and *D. teissieri*) do not appear to contain a functional  
500 PE. Notably, we find PEs vary in prevalence in the São Tomé population between collection  
501 years and although our PCR scans did not detect exons on the continent it is possible that it is  
502 present in continental populations at both low population and intra-genome frequencies.

503 *Drosophila teissieri* (and *D. sechellia* and, to a lesser extent, *D. mauritiana*) poses an  
504 interesting case. The detection of PEs using short reads revealed the presence of highly  
505 fragmented PEs. This might indicate that PEs were present and active in the past but they are  
506 now degenerated. Certainly a larger collection of *D. teissieri* individuals will be needed before  
507 this hypothesis can be formally tested.

508 *Drosophila yakuba* is the third species in the *melanogaster* group found to be infected by  
509 PEs, and unlike other species, PEs are still actively segregating at a low frequency. Our findings  
510 have three broad implications: *i*) that the increase in frequency of PEs is not always monotonic  
511 after an invasion occurs *ii*) they indicate that PEs in *D. yakuba* cause a much milder hybrid  
512 dysgenesis syndrome than that observed in *D. simulans* and *D. melanogaster*, and *iii*) pose the  
513 possibility of transmission of PEs through hybridization and subsequent introgression.

514

### 515 **Variable frequency of PEs across time points**

516

517 *Drosophila yakuba* represents the latest case of an invasion of PEs in natural populations. Of all  
518 the known invasions, it also represents the only case in which a decrease in PE frequency over  
519 time has been noted in natural populations. In both *D. simulans* and *D. melanogaster*, the  
520 invasion of PEs was discovered when it was widely distributed across worldwide populations.  
521 These three invasions represent a natural system in which to explore TE spread and the evolution  
522 of repressive systems to counter it.

523 A similar approach has used artificial invasions of PEs to understand how fast they occur.  
524 Kofler et al. (Kofler *et al.* 2018) studied the genome invasion by PEs in *D. simulans* and found  
525 that the process had two stages. First, and rapidly after the PE introduction, PEs increased in  
526 frequency, especially at high temperatures. In the second stage, PE frequency plateaued at a high  
527 frequency throughout the population but did not fix. Notably, the number of copies of the PE per  
528 genome in this *D. simulans* invasion were similar to those observed in *D. melanogaster* (Figure  
529 1B in Kofler et al. 2018 and Figure 1). The magnitude of the natural invasion in *D. yakuba* here  
530 reported is much smaller and more akin to the rate of transposition observed in the experimental  
531 invasion of *D. simulans* at lower temperatures.

532 Surprisingly, in contrast to the allelic and geographic spread of PEs witnessed in *D.*  
533 *melanogaster* and *D. simulans*, in *D. yakuba* we see a rapid increase (18%) in frequency between  
534 2013 and 2015, subsequently followed by a pronounced drop (2%) in 2018. Seasonal variation in  
535 genetic frequencies over time seems to be a common phenomenon in nature (Bergland *et al.*  
536 2014). Longitudinal studies of *Drosophila* populations in temperate regions have found temporal  
537 variation in multiple genomic regions which have been hypothesized to be related to seasonal  
538 fitness variation related to temperature and humidity. The range of *D. yakuba*, and São Tomé in  
539 particular, are tropical environments and do not experience changes in temperature as large as  
540 temperate areas of the globe but they still show environmental yearly cycles. A systematic  
541 longitudinal collection will be required to answer the nature and amplitude of the observed PE  
542 frequency decline.

543 A second genetic element that shows variation in frequency across years in *D. yakuba*  
544 from São Tomé is *Wolbachia*. Between 2001 and 2009, the frequency of *Wolbachia* in *D. yakuba*  
545 experienced an increase from 25% to 75%. Between 2009 and 2015, there was no increase in  
546 infection frequency (Cooper *et al.* 2017a). A finer temporal scale sampling is needed to resolved  
547 whether this variation is related to seasonality or corresponds to longer cycles. Regardless of the

548 actual timescale, whether the variation is explained by seasonal cycles or the amplitude of the  
549 period is longer, the variability in *Wolbachia* and PE elements in species found in São Tomé  
550 suggest that seasonal temporal studies need to be conducted in tropical populations as well as  
551 temperate ones.

552         Although the mechanism that led to such a drastic decline in infected individuals between  
553 2015 and 2018 is unknown, there are two possibilities. *Wolbachia* has been hypothesized to  
554 prevent virus infection; if PEs are transmitted by viruses (and idea that remains highly  
555 speculative) the increase in frequency of *Wolbachia* could be responsible for the decrease in PE  
556 frequency. Such protective effects have been reported in mosquitoes (van den Hurk *et al.* 2012;  
557 Lee *et al.* 2013; Johnson 2015; Aliota *et al.* 2016) and *Drosophila* (Hedges *et al.* 2008; Osborne  
558 *et al.* 2009, 2012; Martinez *et al.* 2014; Shi *et al.* 2018). In the latter case, the magnitude of the  
559 protection is highly contingent on the *Wolbachia* strain and the genotype host suggesting a strong  
560 genetic interaction (Longdon *et al.* 2012; Martinez *et al.* 2017). This potential protective effect of  
561 *Wolbachia* could explain a decrease in horizontal gene transfer of PEs into *D. yakuba* but not a  
562 decrease in frequency of PEs after they had invaded. Given the lack of evidence for the  
563 involvement of viruses on the transmission of PEs, this possibility should be considered  
564 speculative. An additional possibility is that São Tomé has experienced an increase in  
565 temperature and such conditions lead to the decrease of the frequency of PEs. If *D. yakuba* flies  
566 carrying PEs show a decreased fitness at higher temperatures, then PEs might be expected to  
567 decrease in frequency. Yet, tropical populations of *D. simulans* and *D. melanogaster* have also  
568 seen an increase in their PE frequency, which would argue against this possibility. Additionally,  
569 PEs increase in frequency much more rapidly in synthetic populations of *D. simulans* at higher  
570 temperatures (Kofler *et al.* 2018). It is worth nothing that of the three species from the  
571 *melanogaster* subgroup in which the PE has been found, *D. yakuba* is the most sensitive to high  
572 temperatures (Stanley *et al.* 1980; Matute *et al.* 2009). The interaction between different  
573 environments, such as temperature differences, and the rate of spread of PEs remains mostly  
574 unexplored (but see (Kofler *et al.* 2018)).

575

576 **Mild hybrid dysgenesis in *D. yakuba***

577

578 We found that *D. yakuba* is polymorphic for the presence of PEs. We only found  
579 evidence of PEs in the island of São Tomé where they appear to have invaded between 2013 and  
580 2015 but found no evidence for PEs in the African continent or the islands of Príncipe and Bioko  
581 using our PCR scans. This result is puzzling as population structure between different *D. yakuba*  
582 populations is low (Comeault *et al.* 2016), thus we would expect PEs to spread as the deleterious  
583 effects of PEs are limited compared to those in *D. melanogaster* and *D. simulans*. This recent  
584 invasion of PEs in *D. yakuba*, and more precisely of the populations in São Tomé, represents a  
585 unique opportunity to study a transposable element invasion into a naïve genome and witness  
586 how the genome adapts throughout time (Kofler *et al.* 2018).

587 In *Drosophila*, the deleterious phenotypes of HD tend to manifest in the F1 progeny of  
588 PE<sup>-</sup> females and PE<sup>+</sup> males. We assessed the existence of four possible phenotypes associated  
589 with PE-induced hybrid dysgenesis: *i*) presence of atrophied ovaries, *ii*) reduced number of  
590 ovarioles, *iii*) early onset of reproductive senescence, and *iv*) reduced male fertility. These  
591 defects are all associated to hybrid dysgenesis in *D. melanogaster* (Kidwell *et al.* 1977; Khurana  
592 *et al.* 2011). In *D. simulans*, hybrid dysgenesis is known to cause atrophied ovaries but defects  
593 *ii-iv* have not been explored in relation to PEs. Of the traits we measured, we found that the only  
594 manifestation of hybrid dysgenesis in *D. yakuba* is an increase in the number of atrophied  
595 ovaries in all crosses that involved individuals carrying full PEs, but only at 29°C, and most  
596 frequently in F1 females from the cross ♀PE<sup>-</sup>/♂PE<sup>+</sup>. This mild manifestation of hybrid  
597 dysgenesis might be associated with the recent invasion of the PEs in *D. yakuba*, resulting in low  
598 PE copy number (Nuzhdin 2000). Currently, we have no information as the number of PE copies  
599 in each *D. yakuba* genome, nor its distribution in the genome, but future assemblies with long  
600 reads should be able to address these questions.

601 Surprisingly, we see an increase in ovariole number in F1s that result from PE<sup>+</sup> *D.*  
602 *yakuba* females being crossed to PE<sup>-</sup> *D. yakuba* males. This result is intriguing as it suggests a  
603 potential fitness benefit to PEs into novel genomic backgrounds, a result that has not been  
604 previously described. Comparisons of PE<sup>+</sup> and PE<sup>-</sup> *D. yakuba* isolines show no differences  
605 between the parentals used to obtain the F1s, therefore maternal/paternal differences in fecundity  
606 are unlikely to explain this result. If an increase of ovariole number in a PE<sup>+</sup>/PE<sup>-</sup> cross is only  
607 seen in *D. yakuba* or also occurs in *D. melanogaster* and *D. simulans* remains to be tested. If this  
608 pattern holds across distinct species, it can provide an explanatory driving force behind the rapid

609 expansion of PEs across worldwide populations, in terms of coupling a fitness advantage with  
610 innate TE's self-replicating nature.

611

## 612 **Transmission of PEs between species**

613

614 PEs are thought to have originated in the Neotropical *willinstoni* group, a group 50-60  
615 million years separated from the *melanogaster* lineage split (Throckmorton 1975; Beverley and  
616 Wilson 1984). Our findings of PEs recently incorporating into the *D. yakuba*' genome, deepens  
617 the puzzle of how PEs move across species boundaries. None of the species from the  
618 *melanogaster* species subgroup can hybridize with species from the *willinstoni* group. In the case  
619 of *D. melanogaster* and *D. simulans*, crosses produce hybrid progeny from the sex of the mother  
620 and in most cases the progeny is sterile. One exception is crosses between *D. melanogaster*  
621 In(1)AB females which can produce fertile female F1s when crossed with the *D. simulans* strain  
622 C167.4 (Davis *et al.* 1996). These hybrid viability rescue mutations in the genes *Lhr* and *Hmr*  
623 seem to segregate at very low frequency in nature and are unlikely to constitute a bridge for gene  
624 transfer. *Drosophila melanogaster* and *D. yakuba* also can produce viable hybrids, only when  
625 behavioral isolation is circumvented, but the resulting hybrids are sterile in all cases (Sánchez  
626 and Santamaria 1997). Similarly, *D. simulans* females and *D. yakuba* males produce viable, yet  
627 sterile, female offspring (Orr 1993; Turissini *et al.* 2018).

628 The high level of similarity of the PE sequences across all species, and the longitudinal  
629 data collected for *D. melanogaster*, *D. simulans*, and *D. yakuba*, are consistent with a recent  
630 transmission of this genetic element across species of *Drosophila*. Since hybridization does not  
631 seem to be the mode of transmission of PEs (see above), the possibility of horizontal gene  
632 transfer seems more likely. Horizontal gene transfer (HGT) has been hypothesized as a major  
633 mechanism of distribution across various transposable elements (Keeling and Palmer 2008;  
634 Schaack *et al.* 2010). The leading hypothesis regarding interspecific HGT of PEs (in particular  
635 the transfer of PEs from *D. willinstoni* into *D. melanogaster*) argues that the mouthpieces of the  
636 mite *Proctoeolaelaps regalis*, who feeds on *Drosophila* eggs, might function as a micro-injection  
637 device and might facilitate DNA transfer between embryos. Support for this hypothesis stems  
638 from the presence of PEs in both mites and flies, and the ecological overlap of *D. melanogaster*,  
639 *D. willinstoni* and *P. regalis* (Houck *et al.* 1991). Yet this mechanism has not been directly

640 demonstrated (Houck *et al.* 1991; Engels 1992). Other non-mite vectors are also possible, but  
641 have been less explored. For example, TEs can also be transmitted through viruses (Loreto *et al.*  
642 2008) but the relevance of viruses on HGT in *Drosophila* is largely underexplored. As with other  
643 cases of HGT, the precise mechanism through which TEs have successfully spread across the  
644 majority of higher order Eukaryotes, making up large portions of their genome, is not well  
645 understood, and further exploration is required to understand the role of HGT in eukaryotic  
646 evolution (Fedoroff 2012).

647 Notably, *D. yakuba* hybridizes with two other species and produce stable hybrid zones in  
648 the islands of São Tomé and Bioko (*D. santomea* (Llopart *et al.* 2009; Comeault *et al.* 2016) and  
649 *D. teissieri* (Cooper *et al.* 2017b) respectively). As of 2018 neither species contains active PEs.  
650 This raises the question of why PEs have not crossed from *D. yakuba* into *D. santomea* nor *D.*  
651 *teissieri*. Areas of secondary contact, as well as laboratory crosses, will reveal whether PEs are  
652 prone to be transferred through introgression or whether their interspecific transfer is penalized  
653 at a greater rate between species than within (Waugh O'Neill *et al.* 1998; Labrador *et al.* 1999).  
654 Another naturally hybridizing species that might serve as potential system through which to  
655 explore the role of hybridization in the transfer of PEs occurs in the Seychelles archipelago.  
656 *Drosophila simulans* and *D. sechellia* hybridize in the central islands of the archipelago where  
657 human density is the highest (Matute and Ayroles 2014). PEs have been found in *D. simulans* but  
658 not in *D. sechellia*, similar to the observations of the presence of PEs in *D. yakuba* but not in its  
659 sibling species. These hybrid zones should be explored to assess potential expansions or  
660 limitations of PEs across species boundaries through hybridization and introgression.

661

## 662 **Conclusions and future directions**

663

664 A precise quantification of the frequency of PEs, and TEs in general, across different  
665 species is still in its infancy (Watson and Demuth 2013; Serrato-Capuchina and Matute 2018).  
666 Even though the phenomenon of hybrid dysgenesis has been rigorously characterized in *D.*  
667 *melanogaster* (Kelleher 2016), the discovery of PEs in other *Drosophila* species allows us to  
668 understand how these elements behave in different genetic backgrounds. In the case of *D.*  
669 *yakuba*, PEs cause a hybrid dysgenesis phenomenon which is much milder than in *D.*  
670 *melanogaster* and almost exclusively manifests at 29°C. We do not know whether this

671 comparatively minor dysgenesis is caused by the recency of the invasion (which would lead to  
672 potentially few copies of the PE), or the genetic background of *D. yakuba*. In any case, these  
673 results suggest that the invasion of PEs in a genome does not have the deterministic outcome of  
674 hybrid dysgenesis, and instead these deleterious effects might be modulated by the timing of the  
675 invasion and/or genetic background of the invaded species. Other reports have found the same  
676 element in mites which suggest the PE is present in other arthropods (Houck *et al.* 1991). The  
677 results shown here strongly suggest that a population level assessment of the presence of PEs in a  
678 wide variety of taxa will be needed before we understand the precise taxonomic distribution and  
679 effects of PEs.

680

#### 681 **ACKNOWLEDGEMENTS**

682 We would like to thank, A.A. Comeault, D.A. Turissini, G. Bates for assistance in the field. C.J.  
683 Jones, B.S. Cooper, and members of the Matute lab, gave us helpful feedback on the  
684 manuscript. This work was supported by NIH award R01GM121750 to D.R.M.. The authors  
685 declare no conflicts of interest.

686



687 **FIGURES AND FIGURE LEGENDS**

688

689 **FIGURE 1. Genome sequences suggest P-elements might be present in the multiple species**  
690 **of the *melanogaster* species group.** Each row represents the genome of an individual isofemale  
691 line or fly. Each colored block shows reads that mapped to the PE sequence of *D. melanogaster*.

692

693

694

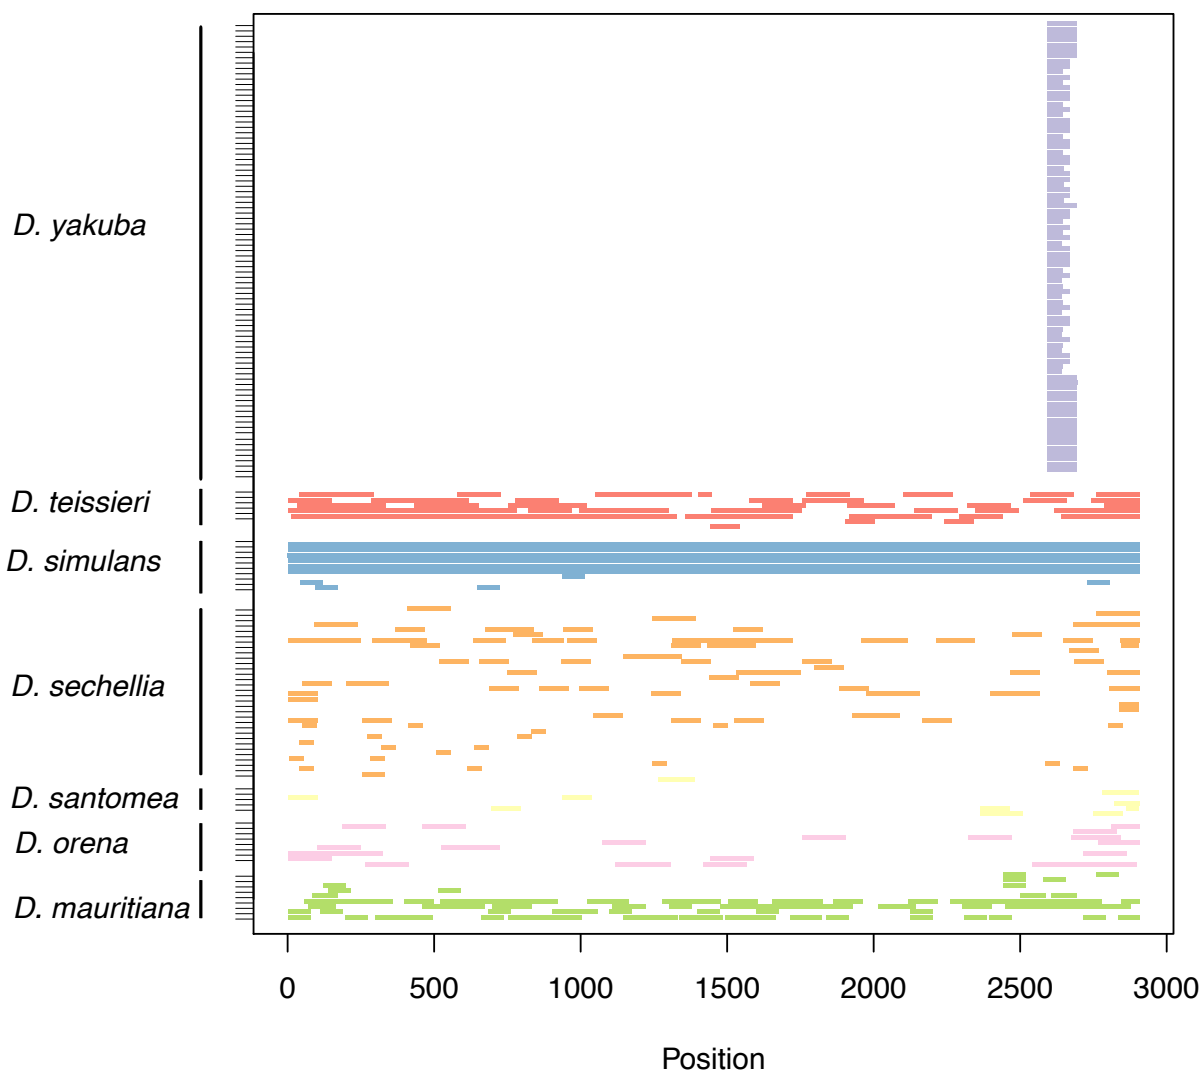

695

696

697

698 **FIGURE 2. Frequency of the PE is *D. yakuba* in collections from five different years in the**  
699 **island of São Tomé.** Frequency represents the proportion of individuals that show evidence for  
700 any of the four exons of the PE in a PCR test. The black dot represents the actual measured  
701 frequency and the bars show the 95% confidence intervals calculated as Bayesian binomial  
702 intervals.

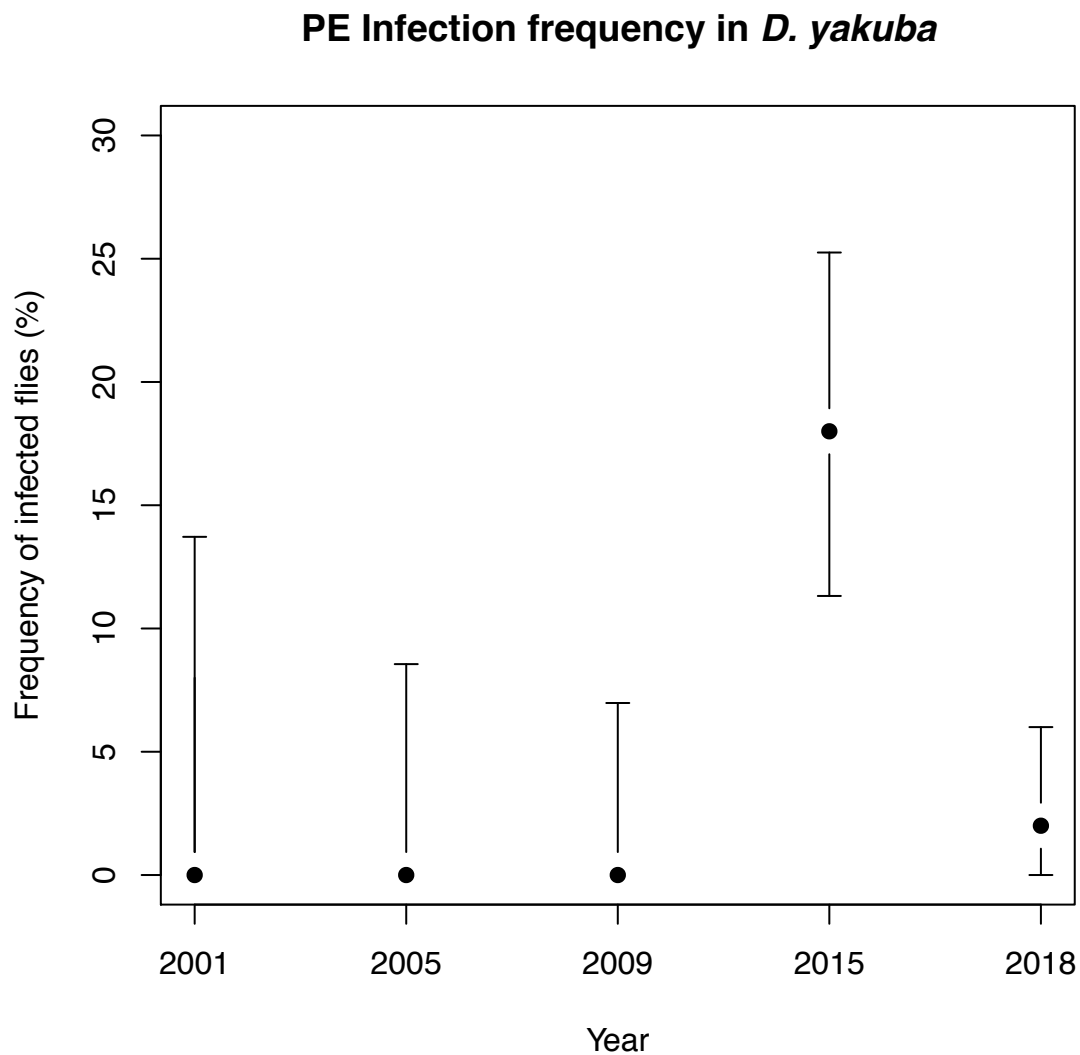

703

704 **FIGURE 3. P-element sequences found in five species of *Drosophila* are not partitioned by**  
705 **species.** A maximum likelihood unrooted tree indicates that the P-elements in different species of  
706 *Drosophila* have not accumulated species-specific mutations suggesting recent horizontal gene  
707 transfer. Number above nodes convey bootstrap support (1,000 replicates). Bootstrap values  
708 below 50% are not shown.  
709

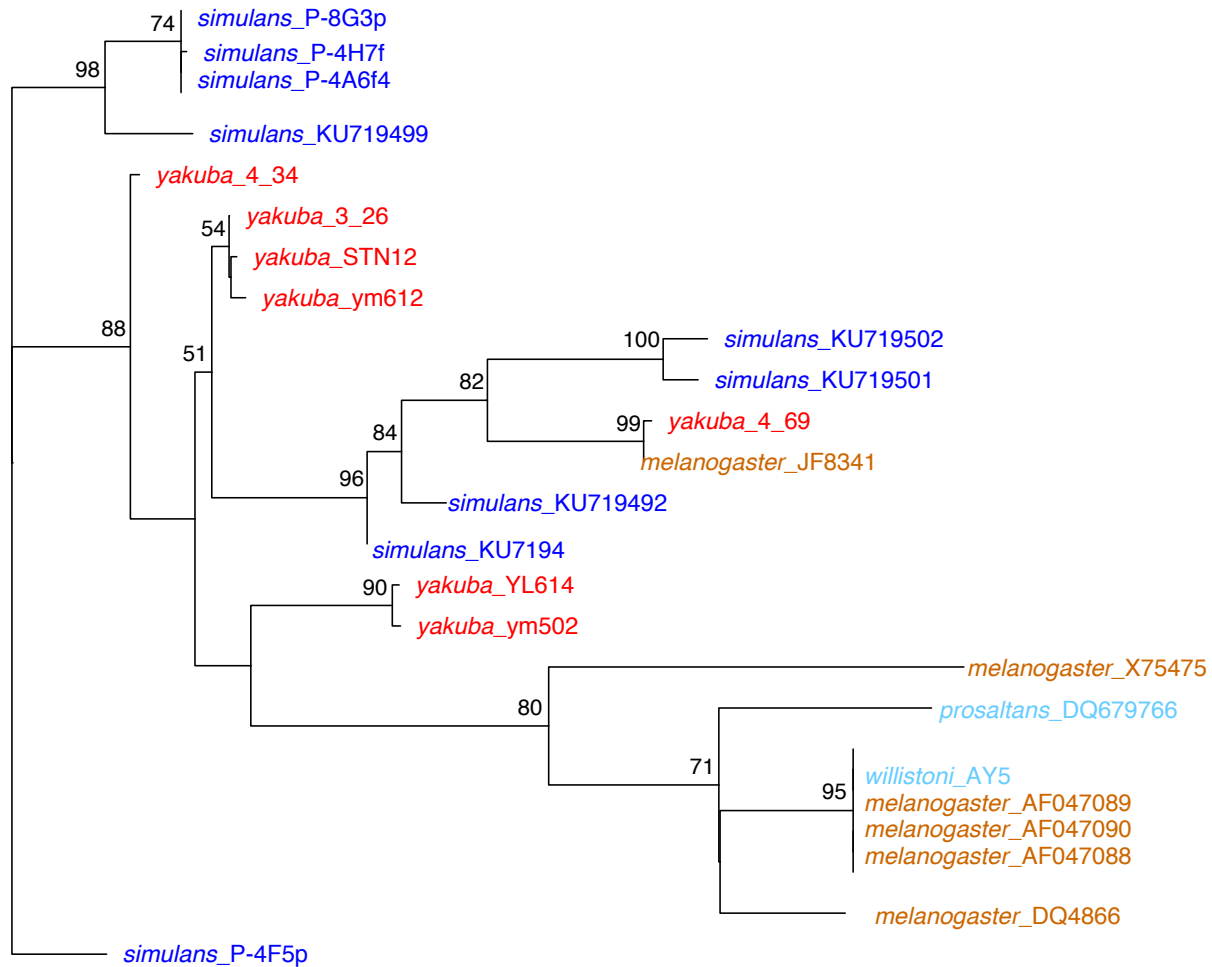

710

711

712 **FIGURE 4. Hybrid dysgenesis in *D. yakuba* in the form of atrophied ovaries at 29°C. A:** All  
713 females shown in this figure have genotype PE<sup>+</sup>/PE<sup>+</sup> and were raised at 29°C. Left: Female with  
714 two ovaries. All F1s raised at 23°C, regardless of their genotype, also have this phenotype.  
715 Middle: Female with one functional (albeit reduced) and one completely atrophied ovary. Right:  
716 Female with two atrophied ovaries. Females in this latter category have no ovarioles. (Scale:  
717 Total length = 1mm, each division = 0.01mm). **B:** Mosaic plot of the proportional number of  
718 ovaries per cross type (designated female/male and PE status) at 29°C. F1 ovary number at 23°C  
719 is not shown as all the scored females, regardless of their genotype, have 2 ovaries.  
720

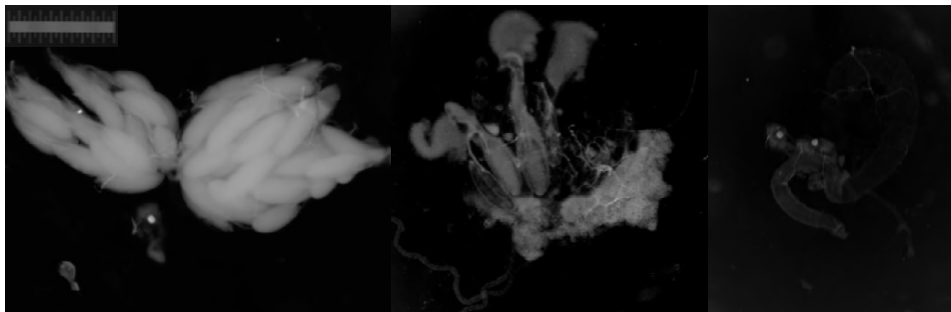

A

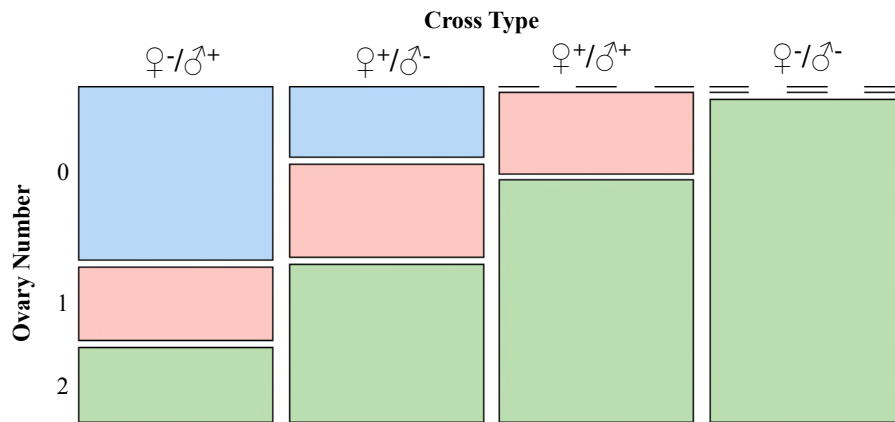

B

721

722

723 **FIGURE 5. Hybrid dysgenesis in *D. yakuba* in the form of reduced number of ovarioles per**  
724 **ovary at 29°C.** The boxplots show the ovariole number in the four possible F1 genotypes at two  
725 different temperatures: 23°C (A) and 29°C (B).  
726

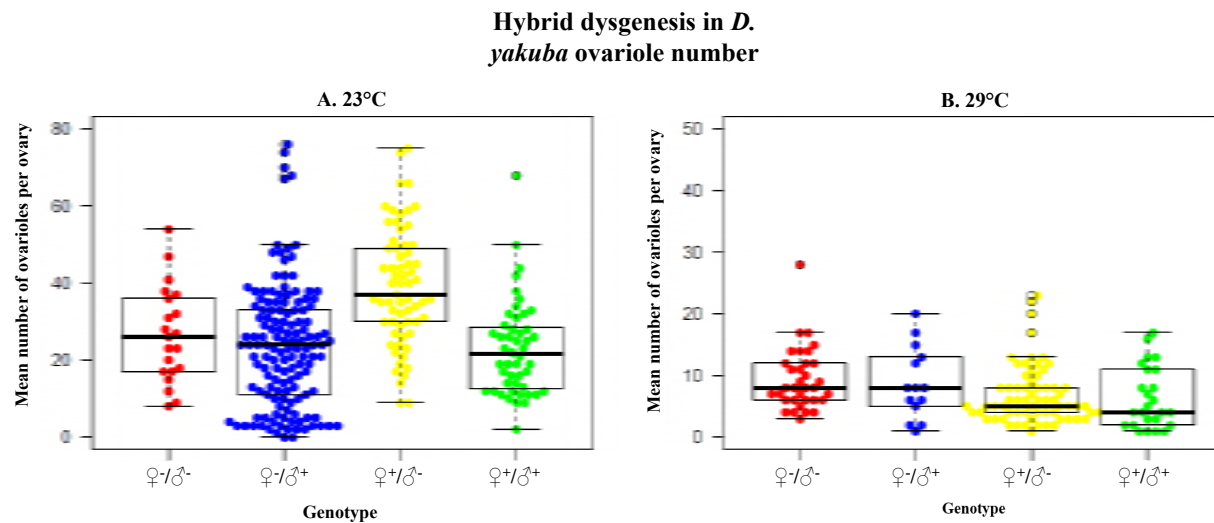

727

728 **FIGURE 6. Number of ovarioles observed in PE+ and PE- females as they age.** Red points  
729 show the observations for the ten PE<sup>-</sup> lines. The red line shows the linear regression for these  
730 observations. Blue dots show the observations for the five PE<sup>+</sup> lines. The blue line shows the  
731 linear regression for these observations. We found no difference in the intercept or the slope of  
732 the two regressions (Table 3), which indicates that PE elements have no discernable effect on  
733 reproductive senescence.  
734

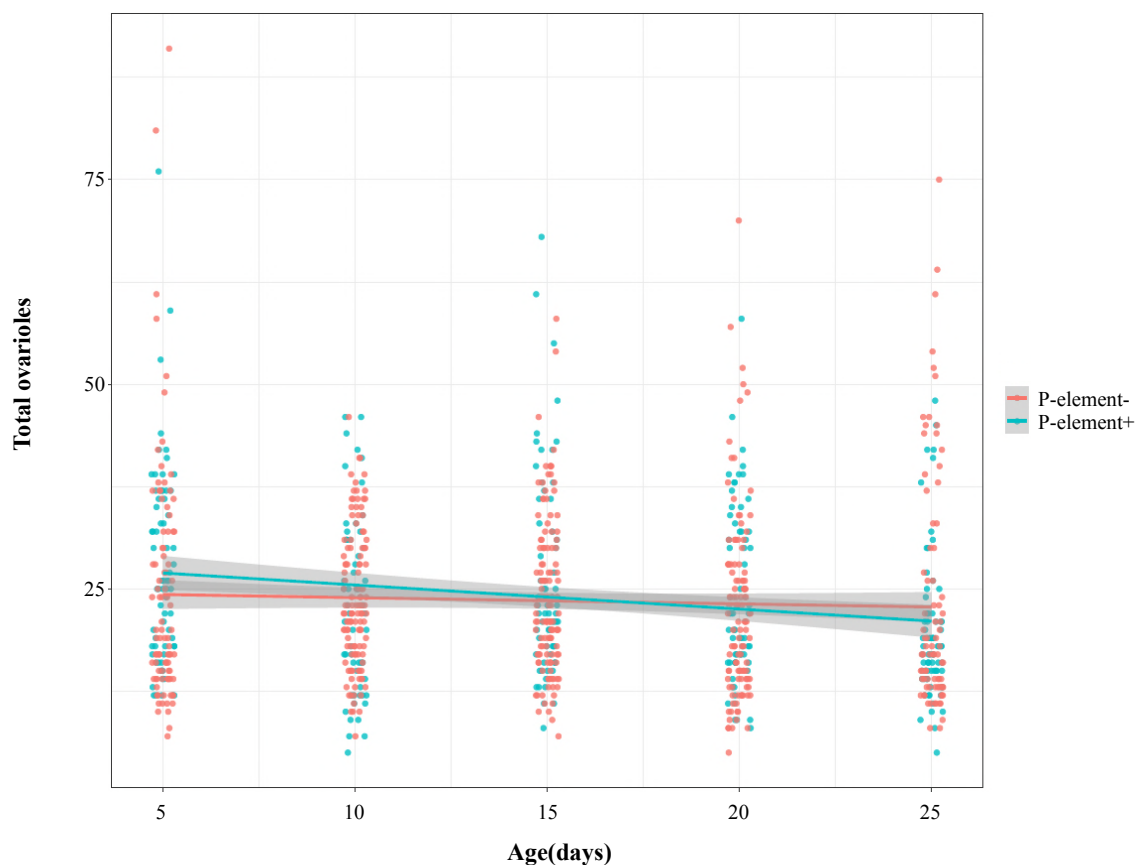

735

736 **TABLE 1. The presence of PEs affects the number of ovaries in F1 *D. yakuba* female (from**  
 737 **intraspecific matings) at 29°C.** *N* is the number of dissected females that produced the means  
 738 (percentage of females mated) and standard deviations (SD). The last four columns show  
 739 pairwise comparisons as 4 × 4 matrices for each cross. The upper triangular matrix shows the Z  
 740 value from an approximate Two-Sample Fisher-Pitman Permutation Test (9,999 permutations).  
 741 The lower triangular matrix shows the P-value associated to the comparison. Only pairwise  
 742 comparisons with P < 0.008 were considered significant.  
 743

| Cross                                    | <i>N</i> | Mean  | SD    | Pairwise comparisons                     |                                          |                                          |                                          |
|------------------------------------------|----------|-------|-------|------------------------------------------|------------------------------------------|------------------------------------------|------------------------------------------|
|                                          |          |       |       | ♀ PE <sup>+</sup> ×<br>♂ PE <sup>+</sup> | ♀ PE <sup>+</sup> ×<br>♂ PE <sup>-</sup> | ♀ PE <sup>-</sup> × ♂<br>PE <sup>+</sup> | ♀ PE <sup>-</sup> × ♂<br>PE <sup>-</sup> |
| ♀ PE <sup>+</sup> ×<br>♂ PE <sup>+</sup> | 34       | 1.323 | 0.791 | *                                        | -0.099                                   | -2.809                                   | 4.262                                    |
| ♀ PE <sup>+</sup> ×<br>♂ PE <sup>-</sup> | 85       | 1.306 | 0.817 | 1                                        | *                                        | -3.453                                   | 4.514                                    |
| ♀ PE <sup>-</sup> ×<br>♂ PE <sup>+</sup> | 36       | 0.694 | 0.920 | 6.101 × 10 <sup>-3</sup>                 | 4 × 10 <sup>-4</sup>                     | *                                        | 5.882                                    |
| ♀ PE <sup>-</sup> ×<br>♂ PE <sup>-</sup> | 31       | 2.000 | 0.000 | < 1 × 10 <sup>-10</sup>                  | < 1 × 10 <sup>-10</sup>                  | < 1 × 10 <sup>-10</sup>                  | *                                        |

744  
745

746 **TABLE 2. The presence of PEs affects the number of ovarioles in F1 *D. yakuba* females**  
 747 **(from intraspecific matings) at 23°C and at 29°C.** *N* is the number of dissected females that  
 748 produced the means (percentage of females mated) and standard deviations (SD). The last four  
 749 columns show pairwise comparisons as 4 × 4 matrices for each cross. The upper triangular  
 750 matrix shows the Z value from an approximate Two-Sample Fisher-Pitman Permutation Test  
 751 (9,999 permutations). The lower triangular matrix shows the P-value associated to the  
 752 comparison. Only pairwise comparisons with P < 0.008 were considered significant.  
 753  
 754

| 23°C                                     |          |        |       |                                          |                                          |                                          |                                          |
|------------------------------------------|----------|--------|-------|------------------------------------------|------------------------------------------|------------------------------------------|------------------------------------------|
| Cross                                    | <i>N</i> | Mean   | SD    | Pairwise comparisons                     |                                          |                                          |                                          |
|                                          |          |        |       | ♀ PE <sup>+</sup> ×<br>♂ PE <sup>+</sup> | ♀ PE <sup>+</sup> ×<br>♂ PE <sup>-</sup> | ♀ PE <sup>-</sup> ×<br>♂ PE <sup>+</sup> | ♀ PE <sup>-</sup> ×<br>♂ PE <sup>-</sup> |
| ♀ PE <sup>+</sup> ×<br>♂ PE <sup>+</sup> | 49       | 11.469 | 6.252 | *                                        | 5.4109                                   | 0.492                                    | 1.286                                    |
| ♀ PE <sup>+</sup> ×<br>♂ PE <sup>-</sup> | 65       | 19.800 | 7.571 | < 1 × 10 <sup>-10</sup>                  | *                                        | -5.947                                   | -3.218                                   |
| ♀ PE <sup>-</sup> × ♂<br>PE <sup>+</sup> | 138      | 12.089 | 7.978 | 0.629                                    | < 1 × 10 <sup>-10</sup>                  | *                                        | 0.816                                    |
| ♀ PE <sup>-</sup> × ♂<br>PE <sup>-</sup> | 21       | 13.571 | 6.201 | 0.206                                    | 7.001 ×<br>10 <sup>-4</sup>              | 0.411                                    | *                                        |
| 29°C                                     |          |        |       |                                          |                                          |                                          |                                          |
| Cross                                    | <i>N</i> | Mean   | SD    | Pairwise comparisons                     |                                          |                                          |                                          |
|                                          |          |        |       | ♀ PE <sup>+</sup> ×<br>♂ PE <sup>+</sup> | ♀ PE <sup>+</sup> ×<br>♂ PE <sup>-</sup> | ♀ PE <sup>-</sup> ×<br>♂ PE <sup>+</sup> | ♀ PE <sup>-</sup> ×<br>♂ PE <sup>-</sup> |
| ♀ PE <sup>+</sup> ×<br>♂ PE <sup>+</sup> | 15       | 6.360  | 4.974 | *                                        | -0.1676                                  | -1.433                                   | 2.814                                    |
| ♀ PE <sup>+</sup> ×<br>♂ PE <sup>-</sup> | 66       | 6.909  | 4.748 | 0.874                                    | *                                        | 3.724                                    | 3.724                                    |
| ♀ PE <sup>-</sup> × ♂<br>PE <sup>+</sup> | 14       | 8.786  | 5.847 | 0.158                                    | < 1 × 10 <sup>-10</sup>                  | *                                        | 4.024                                    |
| ♀ PE <sup>-</sup> × ♂<br>PE <sup>-</sup> | 34       | 9.382  | 5.069 | 0.005                                    | 1 × 10 <sup>-4</sup>                     | < 1 × 10 <sup>-10</sup>                  | *                                        |

755  
756



757 **TABLE 3. The rate of decrease of reproductive potential is similar in females PE<sup>+</sup> and PE<sup>-</sup>**  
758 **females.** Genotype refers to whether females have PEs. Intercepts (Row 1) and slopes (Row 3)  
759 are similar in the decline of ovariole number as females age indicating that the genotype has no  
760 effect on the initial output or the rate of decay on fertility as age progresses. Df: degrees of  
761 freedom.

|                       | <b>Df</b> | <b>Sum of the squared differences</b> | <b>Mean squared error</b> | <b>F-value</b> | <b>P-value</b> |
|-----------------------|-----------|---------------------------------------|---------------------------|----------------|----------------|
| <b>Genotype</b>       | 1         | 26                                    | 25.90                     | 0.201          | 0.654          |
| <b>Age</b>            | 1         | 1,158                                 | 1158.24                   | 8.995          | 0.003          |
| <b>Genotype × Age</b> | 1         | 468                                   | 467.91                    | 3.634          | 0.057          |
| <b>Residuals</b>      | 855       | 110,095                               | 128.77                    |                |                |

762

763

764

765 **TABLE 4. F1 male sterility at 29°C is more likely to occur if any of the parents carry PEs.**

766 N is the number of dissected males. 95% CI is the 95% confidence interval of the mean. Table

767 S6 shows the relevant LRTs.

768

| <b>Genotype<br/>mother</b> | <b>Genotype<br/>father</b> | <b>N</b> | <b>Proportion of<br/>sterile males</b> | <b>95% CI</b> |
|----------------------------|----------------------------|----------|----------------------------------------|---------------|
| PE <sup>+</sup>            | PE <sup>+</sup>            | 108      | 0.315                                  | 0.230- 0.403  |
| PE <sup>-</sup>            | PE <sup>+</sup>            | 159      | 0.283                                  | 0.323- 0.507  |
| PE <sup>-</sup>            | PE <sup>-</sup>            | 122      | 0.180                                  | 0.134- 0.284  |
| PE <sup>+</sup>            | PE <sup>-</sup>            | 153      | 0.301                                  | 0.332- 0.517  |

769

770

771 **REFERENCES**

- 772 Ågren J. A., and S. I. Wright, 2015 Selfish genetic elements and plant genome size evolution.  
773 Trends Plant Sci. 20: 195–196. <https://doi.org/10.1016/j.tplants.2015.03.007>
- 774 Aliota M. T., S. A. Peinado, I. D. Velez, and J. E. Osorio, 2016 The *wMel* strain of *Wolbachia*  
775 reduces transmission of Zika virus by *Aedes aegypti*. Sci. Rep.  
776 <https://doi.org/10.1038/srep28792>
- 777 Bergland A. O., E. L. Behrman, K. R. O'Brien, P. S. Schmidt, and D. A. Petrov, 2014 Genomic  
778 evidence of rapid and stable adaptive oscillations over seasonal time scales in *Drosophila*.  
779 PLoS Genet. 10: e1004775.
- 780 Beverley S. M., and A. C. Wilson, 1984 Molecular evolution in *Drosophila* and the higher  
781 Diptera. J. Mol. Evol. 21: 1–13.
- 782 Bilinski P., P. S. Albert, J. J. Berg, J. A. Birchler, M. N. Grote, *et al.*, 2018 Parallel altitudinal  
783 clines reveal trends in adaptive evolution of genome size in *Zea mays*. PLOS Genet. 14:  
784 e1007162.
- 785 Chalopin D., M. Naville, F. Plard, D. Galiana, and J. N. Volff, 2015 Comparative analysis of  
786 transposable elements highlights mobilome diversity and evolution in vertebrates. Genome  
787 Biol. Evol. 7: 567–580.
- 788 Chevenet F., C. Brun, A.-L. Bañuls, B. Jacq, and R. Christen, 2006 TreeDyn: towards dynamic  
789 graphics and annotations for analyses of trees. BMC Bioinformatics 7: 439.
- 790 Chuong E. B., N. C. Elde, and C. Feschotte, 2017 Regulatory activities of transposable elements:  
791 from conflicts to benefits. Nat. Rev. Genet. 18:71-86. [dhttps://doi.org/10.1038/nrg.2016.139](https://doi.org/10.1038/nrg.2016.139)
- 792 Cobb M., M. Huet, D. Lachaise, and M. Veuille, 2000 Fragmented forests, evolving flies:  
793 molecular variation in African populations of *Drosophila teissieri*. Mol. Ecol. 9: 1591–  
794 1597.
- 795 Comeault A. A., A. Venkat, and D. R. Matute, 2016 Correlated evolution of male and female  
796 reproductive traits drive a cascading effect of reinforcement in *Drosophila yakuba*. Proc. R.  
797 Soc. London B Biol. Sci. 283: 20160730.
- 798 Comeault A. A., A. Serrato Capuchina, D. A. Turissini, P. J. McLaughlin, J. R. David, and D.R.  
799 Matute, 2017 A nonrandom subset of olfactory genes is associated with host preference in  
800 the fruit fly *Drosophila orena*. Evol. Lett. 63: 16.
- 801 Cooper B. S., P. S. Ginsberg, M. Turelli, and D. R. Matute, 2017a *Wolbachia* in the *Drosophila*

- 802 *yakuba* Complex: Pervasive frequency variation and weak cytoplasmic incompatibility, but  
803 no apparent effect on reproductive isolation. *Genetics* 205: 333–351.
- 804 Cooper B. S., A. Sedghifar, W. T. Nash, A. A. Comeault, and D. R. Matute, 2017b A  
805 maladaptive combination of traits contributes to the maintenance of a stable hybrid zone  
806 between two divergent species of *Drosophila*. bioRxiv 138388.
- 807 Crawley M. J., 1993 *GLIM for Ecologists*.
- 808 Daboussi M.-J., and P. Capy, 2003 Transposable Elements in filamentous fungi. *Annu. Rev.*  
809 *Microbiol.* 57: 275–299.
- 810 Davis A. W., J. Roote, T. Morley, and K. Sawamura, 1996 Rescue of hybrid sterility in crosses  
811 between *D. melanogaster* and *D. simulans*. *Nature*. 380:157-9.
- 812 Debolt S., 2010 Copy number variation shapes genome diversity in Arabidopsis over immediate  
813 family generational scales. *Genome Biol. Evol.* 2: 441–453.
- 814 Ding Y., A. Berrocal, T. Morita, K. D. Longden, and D. L. Stern, 2016 Natural courtship song  
815 variation caused by an intronic retroelement in an ion channel gene. *Nature* 536: 329–332.
- 816 Edgar R. C., 2004 MUSCLE: multiple sequence alignment with high accuracy and high  
817 throughput. *Nucleic Acids Res.* 32: 1792–1797.
- 818 Eggleston W., D. Schlitz, and W. Engels, 1988 P-M hybrid dysgenesis does not mobilize other  
819 transposable element families in *D. melanogaster*. *Nature* 331: 368–370.
- 820 Engels W. R., and C. R. Preston, 1980 Components of hybrid dysgenesis in a wild population of  
821 *Drosophila melanogaster*. *Genetics* 95: 111–128.
- 822 Engels W. R., 1992 The origin of P elements in *Drosophila melanogaster*. *BioEssays* 14: 681–  
823 686.
- 824 Fedoroff N. V., 2012 Transposable elements and genome evolution, *Science* 338: 758–767.
- 825 Fox J., and W. Sanford, 2011 *car: An R Companion to Applied Regression (R package)*.
- 826 Hedges L. M., J. C. Brownlie, S. L. O’Neill, and K. N. Johnson, 2008 *Wolbachia* and virus  
827 protection in insects. *Science* 322:702
- 828 Hill T., C. Schlotterer, and A. J. Betancourt, 2016a Hybrid dysgenesis in *Drosophila simulans*  
829 due to a rapid global invasion of the P-element. *PLoS Genet.* 1–17.
- 830 Hill T., C. Schlotterer, and A. J. Betancourt, 2016b Hybrid dysgenesis in *Drosophila simulans*  
831 associated with a rapid invasion of the P-Element. *PLoS Genet.* 12: e1006058
- 832 Hothorn T., K. Hornik, M. A. Van De Wiel, and A. Zeileis, 2006 A lego system for conditional

- 833 inference. *Am. Stat.* 60: 257–263.
- 834 Houck M. A., J. B. Clark, K. R. Peterson, and M. G. Kidwell, 1991 Possible horizontal transfer  
835 of *Drosophila* genes by the mite *Proctolaelaps regalis*. *Science* 253: 1125–1128.
- 836 Hurk A. F. van den, S. Hall-Mendelin, A. T. Pyke, F. D. Frentiu, K. McElroy, Day A. , Higgs S.,  
837 L. and S. O'Neill 2012 Impact of *Wolbachia* on infection with chikungunya and yellow  
838 fever viruses in the mosquito vector *Aedes aegypti*. *PLoS Negl. Trop. Dis.* 2012: 1892
- 839 Johnson K. N., 2015 The impact of *Wolbachia* on virus infection in mosquitoes. *Viruses*. 7:  
840 5705–5717.
- 841 Keeling P. J., and J. D. Palmer, 2008 Horizontal gene transfer in eukaryotic evolution. *Nat. Rev.*  
842 *Genet.* 9: 605–618.
- 843 Kelleher E. S., 2016 Reexamining the P-element invasion of *Drosophila melanogaster* through  
844 the lens of piRNA silencing. *Genetics* 203: 1513–1531.
- 845 Khurana J. S., J. Wang, J. Xu, B. S. Koppetsch, T. C. Thomson, *et al.*, 2011 Adaptation to P  
846 element transposon invasion in *Drosophila melanogaster*. *Cell* 147: 1551–1563.
- 847 Kidwell M. G., J. F. Kidwell, and J. A. Sved, 1977 Hybrid dysgenesis in *Drosophila*  
848 *melanogaster*: a syndrome of aberrant traits including mutation, sterility and male  
849 recombination. *Genetics* 86: 813–833.
- 850 Kidwell M. G., 1983 Evolution of hybrid dysgenesis determinants in *Drosophila melanogaster*.  
851 *Proc. Natl. Acad. Sci. U. S. A.* 80: 1655–9.
- 852 Kidwell M. G., 1992 Horizontal transfer. *Curr Opin Genet Dev.* 2: 868–873.
- 853 Kofler R., T. Hill, V. Nolte, A. J. Betancourt, and C. Schlötterer, 2015 The recent invasion of  
854 natural *Drosophila simulans* populations by the P-element. *Proc. Natl. Acad. Sci.* 2015:  
855 201500758.
- 856 Kofler R., K.-A. Senti, V. Nolte, R. Tobler, and C. Schlötterer, 2018 Molecular dissection of a  
857 natural transposable element invasion. *Genome Res.* 28: gr.228627.117.
- 858 Kuznetsova A., P. B. Brockhoff, and R. H. B. Christensen, 2015 Tests in Linear Mixed Effects  
859 Models
- 860 Labrador M., M. Farré, F. Utzet, and A. Fontdevila, 1999 Interspecific Hybridization Increases  
861 Transposition Rates of *Osveldo*. *Mol. Biol. Evol* 16: 931–937.
- 862 Lachaise D., M.-L. Cariou, J. R. David, F. Lemeunier, L. Tsacas, *et al.*, 1988 Historical  
863 biogeography of the *Drosophila melanogaster* species subgroup, pp. 159–225 in

- 864 *Evolutionary Biology*,  
865 Lachaise D., M. Harry, M. Solignac, F. Lemeunier, V. Bénassi, *et al.*, 2000 Evolutionary  
866 novelties in islands: *Drosophila santomea*, a new *melanogaster* sister species from São  
867 Tomé. Proc. R. Soc. London B Biol. Sci. 267: 1487–1495.
- 868 Lee Y., C. D. Marsden, L. C. Norris, T. C. Collier, B. J. Main, *et al.*, 2013 Spatiotemporal  
869 dynamics of gene flow and hybrid fitness between the M and S forms of the malaria  
870 mosquito, *Anopheles gambiae*. Proc. Natl. Acad. Sci. U. S. A. 110: 19854–9.
- 871 Llopart A., D. Lachaise, and J. A. Coyne, 2009 An anomalous hybrid zone in *Drosophila*.  
872 Evolution. 59:2602-7.
- 873 Lobell A. S., R. R. Kaspari, Y. L. Serrano Negron, and S. T. Harbison, 2017 The genetic  
874 architecture of ovariole number in *Drosophila melanogaster*: genes with major,  
875 quantitative, and pleiotropic effects. G3. 7: 2391–2403.
- 876 Longdon B., D. K. Fabian, G. D. D. Hurst, and F. M. Jiggins, 2012 Male-killing *Wolbachia* do  
877 not protect *Drosophila bifasciata* against viral infection. BMC Microbiol. 12 Suppl 1:S8.
- 878 Loreto E. L. S., C. M. A. Carareto, and P. Capy, 2008 Revisiting horizontal transfer of  
879 transposable elements in *Drosophila*. Heredity (Edinb). 100: 545–554.
- 880 Marco R., P. Valentina, G. Etienne, T. Cristian, and B. Alessio, 2018 Transposable elements  
881 activity is positively related to rate of speciation in mammals. J. Mol. Evol. 1–8.
- 882 Martinez J., B. Longdon, S. Bauer, Y. S. Chan, W. J. Miller, *et al.*, 2014 Symbionts commonly  
883 provide broad spectrum resistance to viruses in insects: a comparative analysis of wolbachia  
884 strains. PLoS Pathog. 10:e1004369.
- 885 Martinez J., I. Tolosana, S. Ok, S. Smith, K. Snoeck, *et al.*, 2017 Symbiont strain is the main  
886 determinant of variation in *Wolbachia*-mediated protection against viruses across  
887 *Drosophila* species. Mol. Ecol. 26:4072-4084
- 888 Matute D. R., C. J. Novak, and J. A. Coyne, 2009 Temperature-based extrinsic reproductive  
889 isolation in two species of *Drosophila*. Evolution 63: 595–612.
- 890 Matute D. R., 2010 Reinforcement of Gametic Isolation in *Drosophila*. PLoS Biol. 8: e1000341.
- 891 Matute D. R., and J. A. Coyne, 2010 Intrinsic reproductive isolation between two sister species  
892 of *Drosophila*. Evolution 64: 903–920.
- 893 Matute D. R., and J. F. Ayroles, 2014 Hybridization occurs between *Drosophila simulans* and *D.*  
894 *sechellia* in the Seychelles archipelago. J. Evol. Biol. 27: 1057–1068.

- 895 <https://doi.org/10.1111/jeb.12391>
- 896 McClintock B., 1950 The origin and behavior of mutable loci in maize. Proc. Natl. Acad. Sci.  
897 36: 344–355.
- 898 McClintock B., 1953 Induction of Instability at Selected Loci in Maize. Genetics. 38:579-99
- 899 Michalak P., 2009 Epigenetic, transposon and small RNA determinants of hybrid dysfunctions.  
900 Heredity (Edinb). 102: 45–50.
- 901 Nuzhdin S. V., 2000 Sure facts, speculations, and open questions about the evolution of  
902 transposable element copy number, pp. 129–137 in *Transposable Elements and Genome*  
903 *Evolution*, Springer Netherlands, Dordrecht.
- 904 Orr H. a, 1993 Haldane’s rule has multiple genetic causes. Nature 361: 532–533.
- 905 Osborne S. E., Y. S. Leong, S. L. O’Neill, and K. N. Johnson, 2009 Variation in antiviral  
906 protection mediated by different *Wolbachia* strains in *Drosophila simulans*. PLoS Pathog.  
907 10: e1004369
- 908 Osborne S. E., I. Iturbe-Ormaetxe, J. C. Brownlie, S. L. O’Neill, and K. N. Johnson, 2012  
909 Antiviral protection and the importance of *Wolbachia* density and: Tissue tropism in  
910 *Drosophila simulans*. Appl. Environ. Microbiol. 78:6922-6929.
- 911 R-Core-Team, 2013 R: A language and environment for statistical computing.  
912 J.Comput.Graph.Stat. 5.
- 913 Raff J. W., W. G. Whitfield, D. M. Glover, L. Y. Jan, and Y. N. Jan, 1990 Two distinct  
914 mechanisms localise cyclin B transcripts in syncytial *Drosophila* embryos. Development  
915 110: 1249–61.
- 916 Ranz J. M., K. Namgyal, G. Gibson, and D. L. Hartl, 2004 Anomalies in the expression profile  
917 of interspecific hybrids of *Drosophila melanogaster* and *Drosophila simulans*. Genome  
918 Res. 14: 373–379.
- 919 Sánchez L., and P. Santamaria, 1997 Reproductive isolation and morphogenetic evolution in  
920 *Drosophila* analyzed by breakage of ethological barriers. Genetics. 147:231-242.
- 921 Sanmiguel P., and J. L. Bennetzen, 1998 Evidence that a recent increase in maize genome size  
922 was caused by the massive amplification of intergene retrotransposons. Ann. Bot. 82: 37–  
923 44.
- 924 Schaack S., C. Gilbert, and C. Feschotte, 2010 Promiscuous DNA: Horizontal transfer of  
925 transposable elements and why it matters for eukaryotic evolution. Trends Ecol. Evol. 25:

- 926 537–546.
- 927 Schaefer R. E., M. G. Kidwell, and A. Fausto-Sterling, 1979 Hybrid dysgenesis in *Drosophila*  
928 *melanogaster*: Morphological and cytological studies of ovarian dysgenesis. *Genetics* 92:  
929 1141–1152.
- 930 Schnebel E. M., and J. Grossfield, 1988 Antagonistic pleiotropy: an interspecific *Drosophila*  
931 comparison. *Evolution* 42: 306–311.
- 932 Serrato-Capuchina A., and D. Matute, 2018 The Role of Transposable Elements in Speciation.  
933 *Genes*. 9: 254.
- 934 Shi M., V. L. White, T. Schlub, J.-S. Eden, A. A. Hoffmann, *et al.*, 2018 No detectable effect of  
935 *Wolbachia* w Mel on the prevalence and abundance of the RNA virome of *Drosophila*  
936 *melanogaster*. *Proc. R. Soc. B Biol. Sci.* 285: 1883.
- 937 Stanley S. M., P. A. Parsons, G. E. Spence, and L. Weber, 1980 Resistance of species of the  
938 *Drosophila melanogaster* subgroup to environmental extremes. *Aust. J. Zool.* 28: 413-421.
- 939 Sturtevant A. H., 1920 Genetic Studies on *Drosophila simulans*. I. Introduction. Hybrids with  
940 *Drosophila melanogaster*. *Genetics* 5: 488–500.
- 941 Sundar Dorai-Raj A., and M. Sundar Dorai-Raj, 2006 The binom package title binomial  
942 confidence intervals for several parameterizations v1.1.1.
- 943 Tasnim S., and E. S. Kelleher, 2017 p53 is required for female germline stem cell maintenance in  
944 P -element hybrid dysgenesis. 434:215-220
- 945 Throckmorton L. H., 1975 The phylogeny, ecology, and geography of *Drosophila*. *Handb.*  
946 *Genet.* 3: 421–469.
- 947 Trizzino M., Y. S. Park, M. Holsbach-Beltrame, K. Aracena, K. Mika, *et al.*, 2017 Transposable  
948 elements are the primary source of novelty in primate gene regulation. *Genome Res.* 27:  
949 1623–1633.
- 950 Turissini D. A., and D. R. Matute, 2017 Fine scale mapping of genomic introgressions within the  
951 *Drosophila yakuba* clade. *PLoS Genet.* 13: e1006971.
- 952 Turissini D. A., J. A. McGirr, S. S. Patel, J. R. David, and D. R. Matute, 2018 The rate of  
953 evolution of postmating-prezygotic reproductive isolation in *Drosophila*. *Mol. Biol. Evol.*  
954 35: 312–334.
- 955 Venables W. N. (William N. ), B. D. Ripley, and W. N. (William N. ). Venables, 2003 Modern  
956 Applied Statistics With S. *Technometrics* 45: 111–111.



- 957 Vicient C. M., and J. M. Casacuberta, 2017 Impact of transposable elements on polyploid plant  
958 genomes. *Ann. Bot.* 120: 195–207.
- 959 Vieira C., D. Lepetit, S. Dumont, and C. Biémont, 1999 Wake up of transposable elements  
960 following *Drosophila simulans* worldwide colonization. *Mol. Biol. Evol.* 16: 1251–1255.
- 961 Warren I. A., M. Naville, D. Chalopin, P. Levin, C. S. Berger, *et al.*, 2015 Evolutionary impact  
962 of transposable elements on genomic diversity and lineage-specific innovation in  
963 vertebrates. *Chromosom. Res.* 23: 505–531.
- 964 Watson E. T., and J. P. Demuth, 2013 The role of transposable elements in speciation In  
965 *Speciation: Natural Processes, Genetics and Biodiversity*. pp227-250. P. Michalak (ed).  
966 Nova SciencePublishers.
- 967 Waugh O’Neill R. J., M. J. O’Neill, and J. A. Marshall Graves, 1998 Undermethylation  
968 associated with retroelement activation and chromosome remodelling in an interspecific  
969 mammalian hybrid. *Nature* 393: 68–72.
- 970 Wayne M. L., U. Soundararajan, and L. G. Harshman, 2006 Environmental stress and  
971 reproduction in *Drosophila melanogaster*: Starvation resistance, ovariole numbers and early  
972 age egg production. *BMC Evol. Biol.* 6: 57.
- 973 Werren J. H., 2011 Selfish genetic elements, genetic conflict, and evolutionary innovation. *Proc.*  
974 *Natl. Acad. Sci.* 108: 10863–10870.
- 975 Wong L. C., and P. Schedl, 2006 Dissection of *Drosophila* ovaries. *J. Vis. Exp.* 8: 52.  
976
